# Supplementary material
Source: PubMed Central journal article supplement (PMC3986020)
Supplement: supp_1.4.E151_2013-0041-appendix_1.pdf [file supp_1.4.E151_2013-0041-appendix_1.pdf]

## Appendix 1 – Cancer and Histology Codes

ICD-O-3 and included histology codes

| Cancer        | ICD-O-3 Code(s)                                 | Included Histologies                                                                                                   |
|---------------|-------------------------------------------------|------------------------------------------------------------------------------------------------------------------------|
| Colorectal    | C18.0, C18.2 – C18.9<br>C19.9<br>C20.9<br>C21.8 | 8000, 8010, 8020, 8070, 8140, 8144, 8210, 8211, 8221, 8240, 8246, 8260, 8261, 8262, 8263, 8310, 8480, 8481, 8490, 8510 |
| Lung          | C33.9<br>C34.*                                  | 8000, 8010, 8012, 8020, 8040, 8042, 8046, 8070–8072, 8140, 8240, 8246, 8250, 8255, 8260, 8480, 8481, 8550, 8560        |
| Melanoma      | C44.*                                           | 8720 – 8790<br>(with or without ICD-10 code C44.*)                                                                     |
| Female breast | C50.* (female)                                  | 8000, 8010, 8050, 8140, 8211, 8480, 8500, 8501, 8503, 8504, 8510, 8520–8524, 8530, 8541, 8543, 8575                    |
| Prostate      | C61.9                                           | 8000, 8010, 8041, 8046, 8070, 8130, 8140, 8145, 8201, 8255, 8260, 8310, 8340, 8341, 8380, 8480, 8481, 8490, 8500, 8550 |
| Testis        | C62.*                                           | 8000, 8001, 8010, 8140, 8650, 8940, 9061, 9062–9065, 9070, 9071, 9080, 9081, 9083, 9085, 9100, 9101, 9364              |
| Thyroid       | C73.9                                           | 8000, 8010, 8021, 8050, 8070, 8071, 8140, 8260, 8290, 8330, 8331, 8335, 8337, 8340–8344, 8350, 8510                    |

Legend: ICD-O-3 – International Classification of Disease–Oncology, third edition.

Appendix to: de Oliveira C, Bremner K, Pataky R, et al. Trends in use and costs of initial cancer treatment in Ontario. *CMAJ Open* 2013. DOI:10.9788/cmajo.20130041.

Copyright © 2013 Canadian Medical Association or its licensors
