# Supplementary material
Source: PubMed Central journal article supplement (PMC3986020)
Supplement: supp_1.4.E151_2013-0041-appendix_3.pdf [file supp_1.4.E151_2013-0041-appendix_3.pdf]

### Appendix 3 – Supplementary Tables

**Table A.** Number and percentage of patients under age 45 years at diagnosis for specific cancer services by cancer site and year of diagnosis

|                                 | Year of Diagnosis |            |            |            |            |            |            |            |            |            |            | Total       |
|---------------------------------|-------------------|------------|------------|------------|------------|------------|------------|------------|------------|------------|------------|-------------|
|                                 | 1997              | 1998       | 1999       | 2000       | 2001       | 2002       | 2003       | 2004       | 2005       | 2006       | 2007       |             |
| <b>BREAST</b>                   |                   |            |            |            |            |            |            |            |            |            |            |             |
| <i>Total number of patients</i> | 810               | 808        | 826        | 805        | 802        | 814        | 795        | 884        | 930        | 861        | 812        | 9147        |
| Cancer-directed surgery         | 760 (93.8)        | 766 (94.8) | 772 (93.5) | 759 (94.3) | 761 (94.9) | --         | 697 (87.7) | 820 (92.8) | 878 (94.4) | 810 (94.1) | 754 (92.9) | 8346 (91.2) |
| Chemotherapy                    | 568 (70.1)        | 565 (69.9) | 613 (74.2) | 603 (74.9) | 624 (77.8) | 645 (79.2) | 564 (70.9) | 679 (76.8) | 740 (79.6) | 682 (79.2) | 634 (78.1) | 6917 (75.6) |
| Radiation therapy               | 400 (49.4)        | 402 (49.8) | 431 (52.2) | 445 (55.3) | 433 (54)   | 425 (52.2) | 456 (57.4) | 527 (59.6) | 649 (69.8) | 629 (73.1) | 575 (70.8) | 5372 (58.7) |
| Other hospitalizations          | 214 (26.4)        | 205 (25.4) | 218 (26.4) | 207 (25.7) | 194 (24.2) | --         | 216 (27.2) | 242 (27.4) | 251 (27)   | 246 (28.6) | 249 (30.7) | 2438 (26.7) |
| Home care                       | 518 (64)          | 574 (71)   | 639 (77.4) | 627 (77.9) | 600 (74.8) | 632 (77.6) | 630 (79.2) | 653 (73.9) | 731 (78.6) | 697 (81)   | 650 (80)   | 6951 (76)   |
| <b>THYROID</b>                  |                   |            |            |            |            |            |            |            |            |            |            |             |
| <i>Total number of patients</i> | 326               | 309        | 365        | 402        | 456        | 526        | 479        | 587        | 612        | 658        | 674        | 5394        |
| Cancer-directed surgery         | 260 (79.8)        | 248 (80.3) | 300 (82.2) | 317 (78.9) | 369 (80.9) | --         | 454 (94.8) | 560 (95.4) | 590 (96.4) | 638 (97)   | 660 (97.9) | 4872 (90.3) |
| Chemotherapy                    | 0 (0)             | 0 (0)      | 1 (0.3)    | 0 (0)      | 0 (0)      | 1 (0.2)    | 0 (0)      | 0 (0)      | 1 (0.2)    | 1 (0.2)    | 1 (0.1)    | 5 (0.1)     |
| Radiation therapy               | 2 (0.6)           | 0 (0)      | 1 (0.3)    | 1 (0.2)    | 2 (0.4)    | 1 (0.2)    | 0 (0)      | 0 (0)      | 1 (0.2)    | 1 (0.2)    | 1 (0.1)    | 10 (0.2)    |
| Other hospitalizations          | 267 (81.9)        | 264 (85.4) | 292 (80)   | 323 (80.3) | 359 (78.7) | --         | 303 (63.3) | 369 (62.9) | 362 (59.2) | 343 (52.1) | 358 (53.1) | 3594 (66.6) |
| Home care                       | 25 (7.7)          | 38 (12.3)  | 31 (8.5)   | 25 (6.2)   | 33 (7.2)   | 28 (5.3)   | 26 (5.4)   | 29 (4.9)   | 38 (6.2)   | 38 (5.8)   | 32 (4.7)   | 343 (6.4)   |
| <b>MELANOMA</b>                 |                   |            |            |            |            |            |            |            |            |            |            |             |
| <i>Total number of patients</i> | 320               | 302        | 350        | 368        | 332        | 350        | 362        | 351        | 348        | 406        | 327        | 3816        |
| Cancer-directed surgery         | 156 (48.8)        | 154 (51)   | 188 (53.7) | 213 (57.9) | 200 (60.2) | --         | 135 (37.3) | 122 (34.8) | 164 (47.1) | 201 (49.5) | 165 (50.5) | 1746 (45.8) |
| Chemotherapy                    | 13 (4.1)          | 20 (6.6)   | 17 (4.9)   | 19 (5.2)   | 24 (7.2)   | 27 (7.7)   | 21 (5.8)   | 29 (8.3)   | 39 (11.2)  | 42 (10.3)  | 41 (12.5)  | 292 (7.7)   |
| Radiation therapy               | 0 (0)             | 2 (0.7)    | 3 (0.9)    | 6 (1.6)    | 4 (1.2)    | 1 (0.3)    | 5 (1.4)    | 1 (0.3)    | 5 (1.4)    | 17 (4.2)   | 10 (3.1)   | 54 (1.4)    |

|                                 |            |           |            |            |            |           |            |            |            |            |            |             |
|---------------------------------|------------|-----------|------------|------------|------------|-----------|------------|------------|------------|------------|------------|-------------|
| Other hospitalizations          | 53 (16.6)  | 42 (13.9) | 51 (14.6)  | 44 (12)    | 41 (12.3)  | --        | 81 (22.4)  | 91 (25.9)  | 91 (26.1)  | 80 (19.7)  | 82 (25.1)  | 694 (18.2)  |
| Home care                       | 32 (10)    | 35 (11.6) | 46 (13.1)  | 50 (13.6)  | 42 (12.7)  | 51 (14.6) | 51 (14.1)  | 44 (12.5)  | 72 (20.7)  | 63 (15.5)  | 64 (19.6)  | 550 (14.4)  |
| <b>TESTIS</b>                   |            |           |            |            |            |           |            |            |            |            |            |             |
| <i>Total number of patients</i> | 213        | 200       | 206        | 230        | 211        | 236       | 232        | 244        | 248        | 235        | 209        | 2464        |
| Cancer-directed surgery         | 197 (92.5) | 190 (95)  | 186 (90.3) | 217 (94.3) | 202 (95.7) | --        | 175 (75.4) | 234 (95.9) | 232 (93.5) | 223 (94.9) | 204 (97.6) | 2195 (89.1) |
| Chemotherapy                    | 64 (30)    | 66 (33)   | 66 (32)    | 81 (35.2)  | 59 (28)    | 64 (27.1) | 61 (26.3)  | 66 (27)    | 70 (28.2)  | 73 (31.1)  | 60 (28.7)  | 730 (29.6)  |
| Radiation therapy               | 56 (26.3)  | 53 (26.5) | 53 (25.7)  | 56 (24.3)  | 53 (25.1)  | 63 (26.7) | 51 (22)    | 45 (18.4)  | 41 (16.5)  | 38 (16.2)  | 28 (13.4)  | 537 (21.8)  |
| Other hospitalizations          | 59 (27.7)  | 48 (24)   | 41 (19.9)  | 45 (19.6)  | 47 (22.3)  | --        | 65 (28)    | 68 (27.9)  | 74 (29.8)  | 59 (25.1)  | 47 (22.5)  | 607 (24.6)  |
| Home care                       | 39 (18.3)  | 50 (25)   | 47 (22.8)  | 53 (23)    | 39 (18.5)  | 50 (21.2) | 50 (21.6)  | 40 (16.4)  | 59 (23.8)  | 53 (22.6)  | 39 (18.7)  | 519 (21.1)  |

**Note:** -- = we do not have reliable data for that year.

**Table B.** Number and percentage of patients aged 45 years and older at diagnosis for specific cancer services by cancer site and year of diagnosis

|                                 | Year of Diagnosis |             |             |             |             |             |             |             |             |             |             | Total        |
|---------------------------------|-------------------|-------------|-------------|-------------|-------------|-------------|-------------|-------------|-------------|-------------|-------------|--------------|
|                                 | 1997              | 1998        | 1999        | 2000        | 2001        | 2002        | 2003        | 2004        | 2005        | 2006        | 2007        |              |
| <b>BREAST</b>                   |                   |             |             |             |             |             |             |             |             |             |             |              |
| <i>Total number of patients</i> | 4683              | 4686        | 4857        | 4794        | 4976        | 5229        | 4951        | 5145        | 5295        | 5423        | 5631        | 55670        |
| Cancer-directed surgery         | 4489 (95.9)       | 4484 (95.7) | 4678 (96.3) | 4577 (95.5) | 4761 (95.7) | --          | 4414 (89.2) | 4835 (94)   | 5004 (94.5) | 5152 (95)   | 5330 (94.7) | 51371 (92.3) |
| Chemotherapy                    | 1251 (26.7)       | 1385 (29.6) | 1558 (32.1) | 1696 (35.4) | 1976 (39.7) | 2009 (38.4) | 1746 (35.3) | 2100 (40.8) | 2196 (41.5) | 2306 (42.5) | 2471 (43.9) | 20694 (37.2) |
| Radiation therapy               | 2035 (43.5)       | 2217 (47.3) | 2247 (46.3) | 2373 (49.5) | 2421 (48.7) | 2546 (48.7) | 2603 (52.6) | 2746 (53.4) | 3293 (62.2) | 3633 (67)   | 3733 (66.3) | 29847 (53.6) |
| Other hospitalizations          | 918 (19.6)        | 980 (20.9)  | 958 (19.7)  | 971 (20.3)  | 1030 (20.7) | --          | 1196 (24.2) | 1390 (27)   | 1286 (24.3) | 1339 (24.7) | 1399 (24.8) | 12428 (22.3) |
| Home care                       | 2789 (59.6)       | 3028 (64.6) | 3377 (69.5) | 3450 (72)   | 3489 (70.1) | 3608 (69)   | 3591 (72.5) | 3646 (70.9) | 3806 (71.9) | 3943 (72.7) | 4065 (72.2) | 38792 (69.7) |
| <b>LUNG</b>                     |                   |             |             |             |             |             |             |             |             |             |             |              |
| <i>Total number of patients</i> | 1204              | 1191        | 1248        | 1282        | 1305        | 1195        | 1254        | 1342        | 1422        | 1449        | 1480        | 14372        |
| Cancer-directed surgery         | 952 (79.1)        | 957 (80.4)  | 928 (74.4)  | 962 (75)    | 975 (74.7)  | --          | 849 (67.7)  | 915 (68.2)  | 1014 (71.3) | 1046 (72.2) | 1077 (72.8) | 10449 (72.7) |
| Chemotherapy                    | 218 (18.1)        | 248 (20.8)  | 327 (26.2)  | 309 (24.1)  | 341 (26.1)  | 332 (27.8)  | 396 (31.6)  | 563 (42)    | 615 (43.2)  | 615 (42.4)  | 555 (37.5)  | 4519 (31.4)  |
| Radiation therapy               | 285 (23.7)        | 283 (23.8)  | 338 (27.1)  | 317 (24.7)  | 348 (26.7)  | 349 (29.2)  | 351 (28)    | 388 (28.9)  | 434 (30.5)  | 471 (32.5)  | 477 (32.2)  | 4041 (28.1)  |
| Other hospitalizations          | 722 (60.0)        | 703 (59)    | 698 (55.9)  | 724 (56.5)  | 712 (54.6)  | --          | 682 (54.4)  | 780 (58.1)  | 848 (59.6)  | 835 (57.6)  | 840 (56.8)  | 8039 (55.9)  |
| Home care                       | 510 (42.4)        | 535 (44.9)  | 546 (43.8)  | 549 (42.8)  | 489 (37.5)  | 439 (36.7)  | 521 (41.5)  | 581 (43.3)  | 675 (47.5)  | 752 (51.9)  | 774 (52.3)  | 6371 (44.3)  |
| <b>COLORECTAL</b>               |                   |             |             |             |             |             |             |             |             |             |             |              |
| <i>Total number of patients</i> | 3188              | 3479        | 3620        | 3873        | 3940        | 3951        | 3877        | 4254        | 4388        | 4505        | 4546        | 43621        |
| Cancer-directed surgery         | 2778 (87.1)       | 3002 (86.3) | 3173 (87.7) | 3397 (87.7) | 3436 (87.2) | --          | 3540 (91.3) | 3886 (91.3) | 3988 (90.9) | 4055 (90)   | 4073 (89.6) | 38868 (89.1) |
| Chemotherapy                    | 1183 (37.1)       | 1346 (38.7) | 1483 (41)   | 1587 (41)   | 1606 (40.8) | 1610 (40.7) | 1512 (39)   | 1718 (40.4) | 1850 (42.2) | 1794 (39.8) | 1900 (41.8) | 17589 (40.3) |
| Radiation therapy               | 348 (10.9)        | 367 (10.5)  | 430 (11.9)  | 467 (12.1)  | 463 (11.8)  | 522 (13.2)  | 513 (13.2)  | 574 (13.5)  | 694 (15.8)  | 717 (15.9)  | 751 (16.5)  | 5846 (13.4)  |
| Other hospitalizations          | 2463 (77.3)       | 2746 (78.9) | 2851 (78.8) | 3076 (79.4) | 3044 (77.3) | --          | 2935 (75.7) | 3615 (85)   | 3752 (85.5) | 3831 (85)   | 3827 (84.2) | 34219 (78.4) |
| Home care                       | 1650 (51.8)       | 1849 (53.1) | 1965 (54.3) | 2158 (55.7) | 1979 (50.2) | 1974 (50)   | 2055 (53)   | 2272 (53.4) | 2602 (59.3) | 2727 (60.5) | 2870 (63.1) | 24101 (55.3) |
| <b>PROSTATE</b>                 |                   |             |             |             |             |             |             |             |             |             |             |              |
| <i>Total number of patients</i> | 4685              | 4684        | 4947        | 5351        | 6176        | 5846        | 5756        | 6321        | 6861        | 7246        | 7261        | 65134        |
| Cancer-directed surgery         | 2446 (52.2)       | 2201 (47)   | 2266 (45.8) | 2352 (44)   | 2816 (45.6) | --          | 2740 (47.6) | 3073 (48.6) | 3370 (49.1) | 3498 (48.3) | 3403 (46.9) | 30791 (47.3) |

|                        |             |             |             |             |             |             |             |             |             |             |             |              |
|------------------------|-------------|-------------|-------------|-------------|-------------|-------------|-------------|-------------|-------------|-------------|-------------|--------------|
| Chemotherapy           | 57 (1.2)    | 51 (1.1)    | 67 (1.4)    | 78 (1.5)    | 76 (1.2)    | 94 (1.6)    | 51 (0.9)    | 50 (0.8)    | 72 (1)      | 67 (0.9)    | 81 (1.1)    | 744 (1.1)    |
| Radiation therapy      | 1034 (22.1) | 1147 (24.5) | 1121 (22.7) | 1385 (25.9) | 1651 (26.7) | 1636 (28)   | 1582 (27.5) | 1677 (26.5) | 1949 (28.4) | 1968 (27.2) | 2253 (31)   | 17403 (26.7) |
| Other hospitalizations | 2530 (54)   | 2516 (53.7) | 2605 (52.7) | 2666 (49.8) | 2945 (47.7) | --          | 2545 (44.2) | 3046 (48.2) | 3544 (51.7) | 3528 (48.7) | 3563 (49.1) | 30940 (47.5) |
| Home care              | 1290 (27.5) | 1306 (27.9) | 1434 (29)   | 1482 (27.7) | 1631 (26.4) | 1512 (25.9) | 1602 (27.8) | 1764 (27.9) | 2093 (30.5) | 2273 (31.4) | 2345 (32.3) | 18732 (28.8) |

**Note:** -- = we do not have reliable data for that year.

**Table C.** Mean cost estimates for specific cancer services by cancer site and year of diagnosis for the initial year of treatment (patients under age 45 years at diagnosis) (95% confidence intervals in brackets)

|                                 | Year of Diagnosis       |                         |                         |                         |                         |                         |                         |                         |                         |                         |                         | Overall Mean Cost       |
|---------------------------------|-------------------------|-------------------------|-------------------------|-------------------------|-------------------------|-------------------------|-------------------------|-------------------------|-------------------------|-------------------------|-------------------------|-------------------------|
|                                 | 1997                    | 1998                    | 1999                    | 2000                    | 2001                    | 2002                    | 2003                    | 2004                    | 2005                    | 2006                    | 2007                    |                         |
| <b>BREAST</b>                   |                         |                         |                         |                         |                         |                         |                         |                         |                         |                         |                         |                         |
| <i>Total number of patients</i> | 810                     | 808                     | 826                     | 805                     | 802                     | 814                     | 795                     | 884                     | 930                     | 861                     | 812                     | 9,147                   |
| Cancer-directed surgery         | 3,584 (3,167; 4,001)    | 3,433 (3,251; 3,615)    | 3,358 (3,178; 3,538)    | 3,165 (2,994; 3,336)    | 3,115 (2,974; 3,257)    | --                      | 3,426 (3,247; 3,604)    | 3,978 (3,771; 4,186)    | 3,820 (3,661; 3,979)    | 4,330 (4,113; 4,547)    | 4,422 (4,165; 4,679)    | 3,586 (3,514; 3,658)    |
| Chemotherapy                    | 2,286 (2,146; 2,425)    | 2,201 (2,066; 2,337)    | 2,538 (2,255; 2,821)    | 2,589 (2,358; 2,821)    | 4,739 (4,448; 5,030)    | 5,119 (4,797; 5,442)    | 5,383 (4,997; 5,770)    | 6,139 (5,738; 6,540)    | 8,844 (8,193; 9,495)    | 10,836 (9,955; 11,717)  | 11,834 (10,890; 12,777) | 5,756 (5,588; 5,924)    |
| Radiation therapy               | 2,067 (1,899; 2,235)    | 2,030 (1,865; 2,194)    | 2,207 (2,033; 2,381)    | 2,160 (1,993; 2,327)    | 2,177 (2,007; 2,346)    | 2,311 (2,127; 2,495)    | 2,554 (2,352; 2,756)    | 3,102 (2,866; 3,337)    | 4,407 (4,104; 4,710)    | 5,374 (4,984; 5,764)    | 6,268 (5,816; 6,720)    | 3,180 (3,097; 3,264)    |
| Other hospitalizations          | 1,465 (1,157; 1,773)    | 1,297 (1,016; 1,578)    | 1,408 (1,130; 1,686)    | 1,138 (932; 1,344)      | 1,254 (1,035; 1,473)    | --                      | 1,229 (1,001; 1,457)    | 1,405 (1,141; 1,669)    | 1,326 (1,095; 1,556)    | 1,477 (1,243; 1,711)    | 1,862 (1,520; 2,203)    | 1,399 (1,319; 1,479)    |
| Home care                       | 1,275 (1,105; 1,446)    | 1,469 (1,294; 1,643)    | 1,679 (1,496; 1,861)    | 1,617 (1,439; 1,796)    | 1,204 (1,078; 1,331)    | 1,365 (1,189; 1,540)    | 1,351 (1,204; 1,497)    | 1,477 (1,332; 1,622)    | 2,269 (2,076; 2,462)    | 2,854 (2,633; 3,075)    | 2,706 (2,497; 2,915)    | 1,763 (1,709; 1,818)    |
| <b>Total Cost</b>               | 15,460 (14,641; 16,278) | 15,021 (14,296; 15,745) | 16,119 (15,370; 16,868) | 15,374 (14,656; 16,093) | 17,274 (16,534; 18,014) | 18,646 (17,762; 19,530) | 20,271 (19,403; 21,139) | 22,645 (21,754; 23,536) | 27,579 (26,536; 28,623) | 32,486 (31,147; 33,824) | 34,974 (33,563; 36,385) | 21,595 (21,273; 21,918) |
| <b>THYROID</b>                  |                         |                         |                         |                         |                         |                         |                         |                         |                         |                         |                         |                         |
| <i>Total number of patients</i> | 326                     | 309                     | 365                     | 402                     | 456                     | 526                     | 479                     | 587                     | 612                     | 658                     | 674                     | 5,394                   |
| Cancer-directed surgery         | 2,952 (2,744; 3,160)    | 3,098 (2,725; 3,471)    | 3,186 (2,721; 3,651)    | 2,830 (2,646; 3,014)    | 3,088 (2,907; 3,269)    | --                      | 4,228 (4,019; 4,438)    | 4,405 (4,226; 4,585)    | 4,140 (3,982; 4,299)    | 4,900 (4,722; 5,078)    | 4,730 (4,566; 4,894)    | 3,908 (3,840; 3,976)    |
| Chemotherapy                    | -                       | -                       | 8 (-8; 24)              | -                       | -                       | 1 (-1; 2)               | -                       | -                       | 0 (-0; 0)               | 16 (-16; 49)            | 7 (-7; 21)              | 4 (-1; 8)               |
| Radiation therapy               | 18 (-8; 44)             | -                       | 1 (-1; 2)               | 8 (-8; 24)              | 15 (-6; 36)             | 6 (-6; 18)              | -                       | -                       | 5 (-5; 16)              | 6 (-6; 17)              | 14 (-14; 42)            | 7 (2; 12)               |
| Other hospitalizations          | 2,946 (2,565; 3,327)    | 2,817 (2,492; 3,142)    | 2,684 (2,445; 2,924)    | 2,694 (2,458; 2,930)    | 2,878 (2,555; 3,201)    | --                      | 1,774 (1,521; 2,028)    | 1,862 (1,618; 2,107)    | 1,583 (1,448; 1,717)    | 1,510 (1,356; 1,664)    | 1,764 (1,508; 2,019)    | 2,088 (2,014; 2,163)    |
| Home care                       | 126 (-12; 264)          | 199 (29; 369)           | 56 (30; 82)             | 37 (13; 62)             | 45 (22; 68)             | 18 (10; 25)             | 53 (6; 100)             | 32 (15; 48)             | 82 (44; 121)            | 112 (45; 179)           | 81 (44; 119)            | 72 (55; 90)             |
| <b>Total Cost</b>               | 10,102 (9,205; 10,999)  | 9,745 (8,971; 10,519)   | 9,034 (8,274; 9,793)    | 8,695 (8,230; 9,161)    | 9,136 (8,651; 9,622)    | 8,436 (8,062; 8,811)    | 9,266 (8,803; 9,728)    | 9,771 (9,316; 10,226)   | 9,452 (9,077; 9,827)    | 10,242 (9,835; 10,648)  | 10,796 (10,291; 11,301) | 9,580 (9,424; 9,737)    |
| <b>MELANOMA</b>                 |                         |                         |                         |                         |                         |                         |                         |                         |                         |                         |                         |                         |
| <i>Total number of patients</i> | 320                     | 302                     | 350                     | 368                     | 332                     | 350                     | 362                     | 351                     | 348                     | 406                     | 327                     | 3,816                   |
| Cancer-directed surgery         | 751 (583; 919)          | 955 (722; 1,189)        | 1,158 (888; 1,427)      | 956 (801; 1,112)        | 1,245 (1,012; 1,478)    | --                      | 633 (504; 762)          | 679 (523; 834)          | 993 (804; 1,181)        | 1,117 (906; 1,328)      | 1,195 (951; 1,439)      | 910 (850; 969)          |
| Chemotherapy                    | 202 (86; 319)           | 484 (252; 715)          | 484 (244; 723)          | 464 (231; 697)          | 880 (524; 1,236)        | 730 (439; 1,021)        | 743 (408; 1,078)        | 1,012 (626; 1,398)      | 1,478 (1,023; 1,934)    | 1,400 (972; 1,827)      | 1,789 (1,244; 2,333)    | 888 (781; 996)          |
| Radiation therapy               | -                       | 28 (-12; 67)            | 30 (-6; 66)             | 55 (8; 102)             | 37 (1; 73)              | 9 (-8; 26)              | 56 (2; 111)             | 11 (-11; 33)            | 30 (1; 58)              | 216 (74; 357)           | 107 (31; 184)           | 56 (36; 75)             |

|                                 |                         |                         |                        |                         |                        |                        |                         |                         |                         |                         |                         |                         |
|---------------------------------|-------------------------|-------------------------|------------------------|-------------------------|------------------------|------------------------|-------------------------|-------------------------|-------------------------|-------------------------|-------------------------|-------------------------|
| Other hospitalizations          | 454 (310; 599)          | 745 (302; 1,187)        | 403 (242; 565)         | 386 (241; 531)          | 513 (323; 702)         | --                     | 693 (474; 912)          | 1,076 (766; 1,386)      | 839 (608; 1,070)        | 832 (563; 1,102)        | 1,402 (995; 1,810)      | 719 (637; 800)          |
| Home care                       | 141 (81; 201)           | 283 (158; 408)          | 233 (133; 334)         | 349 (199; 499)          | 243 (128; 359)         | 179 (116; 242)         | 216 (139; 294)          | 198 (108; 288)          | 460 (304; 617)          | 373 (261; 485)          | 675 (475; 875)          | 305 (269; 342)          |
| <b>Total Cost</b>               | 3,581 (2,974; 4,189)    | 5,062 (3,911; 6,213)    | 4,225 (3,466; 4,984)   | 3,967 (3,207; 4,728)    | 4,813 (3,930; 5,696)   | 3,929 (3,170; 4,688)   | 4,718 (3,851; 5,585)    | 5,354 (4,402; 6,305)    | 6,414 (5,268; 7,560)    | 6,438 (5,366; 7,510)    | 8,499 (6,976; 10,021)   | 5,188 (4,890; 5,486)    |
| <b>TESTIS</b>                   |                         |                         |                        |                         |                        |                        |                         |                         |                         |                         |                         |                         |
| <i>Total number of patients</i> | 213                     | 200                     | 206                    | 230                     | 211                    | 236                    | 232                     | 244                     | 248                     | 235                     | 209                     | 2,464                   |
| Cancer-directed surgery         | 3,245 (2,058; 4,433)    | 2,806 (2,397; 3,214)    | 2,550 (1,913; 3,187)   | 2,100 (1,733; 2,467)    | 1,690 (1,385; 1,996)   | --                     | 2,180 (1,366; 2,994)    | 2,340 (1,803; 2,877)    | 2,532 (1,991; 3,073)    | 3,378 (2,232; 4,524)    | 3,329 (1,572; 5,085)    | 2,479 (2,227; 2,731)    |
| Chemotherapy                    | 2,087 (1,607; 2,566)    | 2,006 (1,550; 2,463)    | 2,055 (1,593; 2,516)   | 2,271 (1,843; 2,699)    | 1,809 (1,385; 2,233)   | 1,837 (1,421; 2,253)   | 1,652 (1,216; 2,089)    | 1,724 (1,266; 2,182)    | 2,327 (1,800; 2,855)    | 2,816 (2,204; 3,428)    | 2,588 (1,932; 3,245)    | 2,106 (1,957; 2,256)    |
| Radiation therapy               | 804 (596; 1,012)        | 788 (592; 985)          | 833 (613; 1,054)       | 813 (606; 1,019)        | 805 (589; 1,021)       | 867 (669; 1,066)       | 658 (484; 832)          | 540 (388; 693)          | 521 (361; 680)          | 454 (308; 600)          | 421 (265; 576)          | 678 (622; 734)          |
| Other hospitalizations          | 2,014 (1,235; 2,794)    | 1,924 (875; 2,973)      | 1,181 (653; 1,710)     | 1,489 (860; 2,118)      | 1,468 (742; 2,194)     | --                     | 2,324 (1,503; 3,145)    | 2,469 (1,709; 3,228)    | 2,973 (1,237; 4,708)    | 2,936 (1,854; 4,019)    | 1,711 (1,010; 2,412)    | 2,070 (1,786; 2,354)    |
| Home care                       | 274 (123; 425)          | 362 (185; 539)          | 256 (157; 355)         | 315 (199; 430)          | 249 (138; 360)         | 300 (115; 484)         | 304 (171; 437)          | 224 (120; 328)          | 551 (283; 819)          | 1,065 (581; 1,548)      | 682 (335; 1,030)        | 419 (349; 490)          |
| <b>Total Cost</b>               | 14,474 (12,269; 16,679) | 12,946 (10,789; 15,102) | 11,331 (9,559; 13,104) | 11,950 (10,443; 13,457) | 11,109 (9,478; 12,739) | 11,486 (9,810; 13,162) | 12,891 (10,939; 14,842) | 12,626 (10,749; 14,504) | 14,356 (11,615; 17,096) | 17,259 (13,993; 20,525) | 13,694 (10,785; 16,603) | 13,133 (12,455; 13,810) |

**Note:** -- = we do not have reliable data for that year.

**Table D.** Mean cost estimates for specific cancer services by cancer site and year of diagnosis for the initial year of treatment (patients aged 45 years and older at diagnosis) (95% confidence intervals in brackets)

|                                 | Year of Diagnosis       |                         |                         |                         |                         |                         |                         |                         |                         |                         |                         | Overall Mean Cost       |
|---------------------------------|-------------------------|-------------------------|-------------------------|-------------------------|-------------------------|-------------------------|-------------------------|-------------------------|-------------------------|-------------------------|-------------------------|-------------------------|
|                                 | 1997                    | 1998                    | 1999                    | 2000                    | 2001                    | 2002                    | 2003                    | 2004                    | 2005                    | 2006                    | 2007                    |                         |
| <b>BREAST</b>                   |                         |                         |                         |                         |                         |                         |                         |                         |                         |                         |                         |                         |
| <i>Total number of patients</i> | 4,683                   | 4,686                   | 4,857                   | 4,794                   | 4,976                   | 5,229                   | 4,951                   | 5,145                   | 5,295                   | 5,423                   | 5,631                   | 55,670                  |
| Cancer-directed surgery         | 3,345 (3,198; 3,492)    | 3,273 (3,151; 3,394)    | 3,206 (3,093; 3,319)    | 3,028 (2,954; 3,102)    | 3,145 (3,048; 3,242)    | 2,384 (2,269; 2,499)    | 3,426 (3,341; 3,512)    | 3,840 (3,739; 3,942)    | 3,620 (3,527; 3,713)    | 4,294 (3,954; 4,634)    | 4,255 (4,141; 4,370)    | 3,455 (3,410; 3,501)    |
| Chemotherapy                    | 791 (747; 834)          | 836 (791; 881)          | 939 (887; 991)          | 1,050 (992; 1,108)      | 1,759 (1,665; 1,853)    | 1,827 (1,732; 1,921)    | 2,169 (2,060; 2,277)    | 2,821 (2,693; 2,950)    | 4,152 (3,931; 4,373)    | 5,159 (4,899; 5,418)    | 5,978 (5,697; 6,259)    | 2,594 (2,543; 2,644)    |
| Radiation therapy               | 1,620 (1,560; 1,681)    | 1,680 (1,622; 1,739)    | 1,695 (1,634; 1,755)    | 1,701 (1,641; 1,760)    | 1,661 (1,603; 1,719)    | 1,701 (1,643; 1,759)    | 1,950 (1,882; 2,018)    | 2,330 (2,244; 2,415)    | 3,210 (3,100; 3,319)    | 4,189 (4,054; 4,324)    | 4,920 (4,772; 5,068)    | 2,480 (2,451; 2,509)    |
| Other hospitalizations          | 1,094 (974; 1,213)      | 1,081 (971; 1,191)      | 1,044 (932; 1,156)      | 1,098 (977; 1,220)      | 1,232 (1,107; 1,356)    | 1,218 (1,083; 1,353)    | 1,394 (1,263; 1,525)    | 1,609 (1,441; 1,778)    | 1,406 (1,265; 1,548)    | 1,619 (1,469; 1,769)    | 1,724 (1,539; 1,908)    | 1,332 (1,289; 1,374)    |
| Home care                       | 1,358 (1,267; 1,449)    | 1,532 (1,434; 1,630)    | 1,623 (1,524; 1,723)    | 1,685 (1,587; 1,783)    | 1,319 (1,234; 1,403)    | 1,298 (1,224; 1,372)    | 1,414 (1,331; 1,497)    | 1,514 (1,427; 1,601)    | 2,049 (1,955; 2,142)    | 2,538 (2,439; 2,637)    | 2,504 (2,415; 2,593)    | 1,731 (1,703; 1,758)    |
|                                 | 12,909 (12,556; 13,261) | 13,144 (12,774; 13,513) | 13,785 (13,456; 14,115) | 13,903 (13,555; 14,251) | 14,424 (14,030; 14,817) | 14,552 (14,139; 14,965) | 17,177 (16,768; 17,587) | 19,487 (19,018; 19,956) | 22,626 (22,069; 23,182) | 26,638 (25,960; 27,316) | 28,718 (28,093; 29,344) | 18,229 (18,078; 18,380) |
| <b>Total Cost</b>               |                         |                         |                         |                         |                         |                         |                         |                         |                         |                         |                         |                         |
| <b>LUNG</b>                     |                         |                         |                         |                         |                         |                         |                         |                         |                         |                         |                         |                         |
| <i>Total number of patients</i> | 1,204                   | 1,191                   | 1,248                   | 1,282                   | 1,305                   | 1,195                   | 1,254                   | 1,342                   | 1,422                   | 1,449                   | 1,480                   | 14,372                  |
| Cancer-directed surgery         | 9,046 (8,450; 9,643)    | 8,697 (8,153; 9,241)    | 7,890 (7,376; 8,403)    | 7,953 (7,450; 8,457)    | 8,818 (8,248; 9,389)    | 8,041 (7,240; 8,842)    | 8,697 (7,890; 9,504)    | 8,374 (7,682; 9,066)    | 8,959 (8,275; 9,644)    | 11,130 (9,817; 12,443)  | 10,737 (9,887; 11,587)  | 8,997 (8,763; 9,232)    |
| Chemotherapy                    | 685 (574; 795)          | 860 (731; 989)          | 1,398 (1,226; 1,571)    | 1,431 (1,243; 1,619)    | 1,495 (1,316; 1,673)    | 1,601 (1,415; 1,788)    | 2,055 (1,836; 2,275)    | 2,804 (2,559; 3,049)    | 2,935 (2,704; 3,167)    | 2,853 (2,630; 3,076)    | 2,576 (2,359; 2,794)    | 1,931 (1,870; 1,993)    |
| Radiation therapy               | 676 (596; 755)          | 686 (603; 769)          | 833 (740; 926)          | 710 (630; 790)          | 780 (698; 862)          | 905 (812; 999)          | 838 (749; 927)          | 955 (859; 1,051)        | 1,078 (964; 1,193)      | 1,277 (1,142; 1,412)    | 1,498 (1,327; 1,668)    | 947 (914; 980)          |
| Other hospitalizations          | 3,621 (3,165; 4,077)    | 3,666 (3,280; 4,051)    | 3,228 (2,839; 3,617)    | 3,747 (3,238; 4,256)    | 3,638 (3,212; 4,063)    | 3,283 (2,836; 3,731)    | 3,489 (3,123; 3,855)    | 4,084 (3,609; 4,559)    | 3,990 (3,581; 4,399)    | 4,752 (4,199; 5,305)    | 4,472 (3,833; 5,112)    | 3,845 (3,701; 3,989)    |
| Home care                       | 1,784 (1,543; 2,025)    | 1,544 (1,345; 1,743)    | 1,508 (1,312; 1,703)    | 1,685 (1,462; 1,908)    | 1,082 (919; 1,244)      | 1,051 (870; 1,233)      | 1,249 (1,061; 1,436)    | 1,398 (1,217; 1,579)    | 2,107 (1,871; 2,343)    | 2,216 (2,008; 2,425)    | 2,236 (2,039; 2,432)    | 1,646 (1,584; 1,708)    |
|                                 | 22,037 (21,042; 23,033) | 21,688 (20,712; 22,663) | 20,712 (19,829; 21,595) | 21,715 (20,741; 22,689) | 22,163 (21,240; 23,086) | 22,844 (21,651; 24,037) | 25,002 (23,826; 26,178) | 27,492 (26,293; 28,691) | 29,630 (28,410; 30,850) | 33,968 (32,218; 35,717) | 33,797 (32,210; 35,384) | 25,876 (25,495; 26,257) |
| <b>Total Cost</b>               |                         |                         |                         |                         |                         |                         |                         |                         |                         |                         |                         |                         |

|                                 |                         |                         |                         |                         |                         |                         |                         |                         |                         |                         |                         |                         |
|---------------------------------|-------------------------|-------------------------|-------------------------|-------------------------|-------------------------|-------------------------|-------------------------|-------------------------|-------------------------|-------------------------|-------------------------|-------------------------|
| <b>COLORECTAL</b>               |                         |                         |                         |                         |                         |                         |                         |                         |                         |                         |                         |                         |
| <i>Total number of patients</i> | 3,188                   | 3,479                   | 3,620                   | 3,873                   | 3,940                   | 3,951                   | 3,877                   | 4,254                   | 4,388                   | 4,505                   | 4,546                   | 43,621                  |
| Cancer-directed surgery         | 9,637 (9,288; 9,986)    | 9,598 (9,238; 9,958)    | 9,705 (9,404; 10,005)   | 10,283 (9,928; 10,638)  | 10,694 (10,360; 11,027) | 11,073 (10,645; 11,501) | 12,121 (11,663; 12,579) | 12,675 (12,197; 13,153) | 12,597 (12,118; 13,077) | 14,939 (14,253; 15,626) | 16,080 (15,406; 16,754) | 11,956 (11,808; 12,105) |
| Chemotherapy                    | 2,773 (2,624; 2,923)    | 2,907 (2,755; 3,058)    | 3,242 (3,086; 3,398)    | 3,368 (3,202; 3,534)    | 3,501 (3,324; 3,679)    | 3,375 (3,196; 3,554)    | 3,916 (3,698; 4,134)    | 4,421 (4,208; 4,635)    | 4,371 (4,164; 4,578)    | 3,438 (3,279; 3,597)    | 5,907 (5,639; 6,175)    | 3,814 (3,755; 3,874)    |
| Radiation therapy               | 522 (468; 575)          | 505 (454; 555)          | 569 (517; 621)          | 558 (509; 607)          | 542 (494; 591)          | 592 (543; 642)          | 589 (539; 639)          | 599 (551; 647)          | 708 (657; 760)          | 738 (685; 792)          | 849 (787; 911)          | 624 (609; 640)          |
| Other hospitalizations          | 3,931 (3,680; 4,183)    | 4,157 (3,902; 4,413)    | 4,087 (3,813; 4,361)    | 4,232 (3,951; 4,513)    | 4,144 (3,894; 4,394)    | 2,993 (2,758; 3,227)    | 3,270 (3,043; 3,498)    | 3,794 (3,557; 4,031)    | 3,930 (3,676; 4,184)    | 4,228 (3,977; 4,480)    | 4,610 (4,301; 4,919)    | 3,952 (3,874; 4,031)    |
| Home care                       | 2,190 (2,046; 2,333)    | 2,274 (2,129; 2,418)    | 2,300 (2,151; 2,449)    | 2,390 (2,252; 2,529)    | 1,799 (1,682; 1,916)    | 1,777 (1,664; 1,890)    | 1,925 (1,810; 2,039)    | 2,053 (1,934; 2,172)    | 3,031 (2,885; 3,177)    | 3,526 (3,378; 3,674)    | 3,679 (3,534; 3,823)    | 2,492 (2,450; 2,533)    |
| <b>Total Cost</b>               | 24,769 (24,101; 25,438) | 25,170 (24,516; 25,824) | 25,534 (24,907; 26,161) | 26,699 (26,036; 27,362) | 27,125 (26,427; 27,823) | 26,958 (26,190; 27,727) | 30,274 (29,415; 31,133) | 32,211 (31,360; 33,062) | 34,797 (33,856; 35,737) | 37,821 (36,701; 38,941) | 43,089 (41,902; 44,276) | 30,928 (30,657; 31,199) |
| <b>PROSTATE</b>                 |                         |                         |                         |                         |                         |                         |                         |                         |                         |                         |                         |                         |
| <i>Total number of patients</i> | 4,685                   | 4,684                   | 4,947                   | 5,351                   | 6,176                   | 5,846                   | 5,756                   | 6,321                   | 6,861                   | 7,246                   | 7,261                   | 65,134                  |
| Cancer-directed surgery         | 2,886 (2,753; 3,019)    | 2,591 (2,468; 2,713)    | 2,544 (2,434; 2,653)    | 2,447 (2,350; 2,545)    | 2,775 (2,669; 2,882)    | 2,678 (2,570; 2,786)    | 2,994 (2,836; 3,153)    | 3,225 (3,096; 3,353)    | 3,174 (3,083; 3,264)    | 3,786 (3,629; 3,943)    | 3,815 (3,687; 3,944)    | 3,050 (3,012; 3,088)    |
| Chemotherapy                    | 23 (12; 34)             | 10 (6; 14)              | 15 (7; 22)              | 19 (6; 31)              | 19 (12; 26)             | 27 (17; 36)             | 30 (17; 43)             | 16 (9; 24)              | 34 (18; 50)             | 26 (15; 36)             | 29 (16; 42)             | 23 (20; 26)             |
| Radiation therapy               | 1,334 (1,259; 1,409)    | 1,613 (1,527; 1,700)    | 1,559 (1,472; 1,646)    | 1,792 (1,703; 1,882)    | 1,926 (1,838; 2,014)    | 2,087 (1,992; 2,181)    | 2,146 (2,046; 2,245)    | 2,077 (1,981; 2,172)    | 2,339 (2,236; 2,443)    | 2,402 (2,293; 2,512)    | 2,978 (2,849; 3,106)    | 2,084 (2,053; 2,115)    |
| Other hospitalizations          | 1,598 (1,463; 1,732)    | 1,631 (1,488; 1,774)    | 1,660 (1,520; 1,800)    | 1,574 (1,448; 1,699)    | 1,619 (1,496; 1,743)    | 1,223 (1,081; 1,364)    | 1,627 (1,470; 1,784)    | 1,557 (1,421; 1,692)    | 1,588 (1,449; 1,726)    | 1,629 (1,492; 1,766)    | 1,725 (1,589; 1,860)    | 1,586 (1,544; 1,628)    |
| Home care                       | 501 (436; 565)          | 474 (411; 537)          | 478 (421; 535)          | 409 (360; 458)          | 313 (279; 348)          | 311 (272; 351)          | 350 (302; 397)          | 324 (289; 360)          | 524 (484; 564)          | 638 (599; 676)          | 645 (604; 686)          | 458 (444; 472)          |
| <b>Total Cost</b>               | 11,490 (11,179; 11,801) | 11,617 (11,311; 11,922) | 11,814 (11,519; 12,109) | 11,774 (11,501; 12,046) | 12,081 (11,807; 12,356) | 11,931 (11,630; 12,232) | 12,894 (12,553; 13,235) | 13,099 (12,758; 13,440) | 13,367 (13,050; 13,683) | 13,800 (13,469; 14,131) | 15,141 (14,777; 15,505) | 12,785 (12,687; 12,882) |

**Note:** -- we do not have reliable data for this year.
