# Supplementary material
Source: PubMed Central journal article supplement (PMC3986020)
Supplement: supp_1.4.E151_Original_submission_2013-0041.pdf [file supp_1.4.E151_Original_submission_2013-0041.pdf]

1  
2  
3 **Title:** Trends in Utilization and Costs of Initial Cancer Treatment in Ontario  
4  
5  
6  
7

8 **Authors:**  
9

- 10 • Claire de Oliveira MA PhD; Centre for Addiction and Mental Health. Toronto  
11 Health Economics and Technology Assessment Collaborative.  
12
- 13 • Karen E. Bremner BSc; University Health Network. Toronto Health Economics  
14 and Technology Assessment Collaborative.  
15
- 16 • Reka Pataky BSc MSc; Canadian Centre for Applied Research in Cancer Control.  
17 British Columbia Cancer Agency.  
18
- 19 • Nadia Gunraj BSc MPH; Institute for Clinical Evaluative Sciences, Sunnybrook  
20 Health Sciences Centre.  
21
- 22 • Mahbubul Haq BSc MSc; Institute for Clinical Evaluative Sciences, Sunnybrook  
23 Health Sciences Centre.  
24
- 25 • Kelvin Chan MD MSc FRCPC; Department of Medicine, University of Toronto.  
26 Sunnybrook Health Sciences Centre and Princess Margaret Hospital.  
27
- 28 • Winson Y. Cheung MD MPH FRCPC; British Columbia Cancer Agency.  
29 University of British Columbia  
30
- 31 • Jeffrey S. Hoch MA PhD; Canadian Centre for Applied Research in Cancer  
32 Control. St. Michael's Hospital. Cancer Care Ontario. Institute of Health Policy,  
33 Management and Evaluation, University of Toronto.  
34
- 35 • Stuart Peacock MSc DPhil; Canadian Centre for Applied Research in Cancer  
36 Control. British Columbia Cancer Agency. School of Population and Public  
37 Health, University of British Columbia.  
38  
39  
40  
41  
42  
43  
44  
45  
46  
47  
48  
49  
50  
51  
52  
53  
54  
55  
56  
57  
58  
59  
60

- Murray D. Krahn MD MSc FRCPC; Toronto Health Economics and Technology Assessment Collaborative. Department of Medicine and Faculty of Pharmacy, University of Toronto. University Health Network.

**Disclaimers:** None.

**Corresponding author:**

Claire de Oliveira

Independent Scientist/Health Economist

Centre for Addiction and Mental Health

Department of Social and Epidemiological Research

33 Russell Street, Room T414

Toronto, Ontario

M5S 2S1 Canada

Telephone: 416-535-8501 extension 36098

Fax: 416-595-6899

E-mail: [claire.deoliveira@camh.ca](mailto:claire.deoliveira@camh.ca) (can be published)

All requests for reprints should be addressed to this author.

1  
2  
3 **Source of support:** This project was funded by a research grant from the Canadian  
4  
5 Cancer Society Research Institute (grant # 020200). Dr. Krahn is supported by the F.  
6  
7 Norman Hughes Chair in Pharmacoeconomics at the Faculty of Pharmacy, University of  
8  
9 Toronto.  
10  
11

12  
13  
14  
15 **Word Count:** 2,501  
16  
17

18  
19  
20 **Number of figures and tables:** Tables: 2; Figures: 5.  
21  
22  
23  
24  
25  
26  
27  
28  
29  
30  
31  
32  
33  
34  
35  
36  
37  
38  
39  
40  
41  
42  
43  
44  
45  
46  
47  
48  
49  
50  
51  
52  
53  
54  
55  
56  
57  
58  
59  
60

Confidential

1  
2  
3 **ABSTRACT** Word Count: 250  
4

5 **Background:** Cancer incidence and treatment-related costs are rising in Canada. We  
6  
7  
8  
9  
10  
11  
12  
13  
14  
15  
16  
17  
18  
19  
20  
21  
22  
23  
24  
25  
26  
27  
28  
29  
30  
31  
32  
33  
34  
35  
36  
37  
38  
39  
40  
41  
42  
43  
44  
45  
46  
47  
48  
49  
50  
51  
52  
53  
54  
55  
56  
57  
58  
59  
60  
estimated health care utilization and costs in the first year post-diagnosis for patients  
diagnosed with seven common types of cancer in Ontario to examine temporal trends in  
patterns of care and costs.

**Methods:** We selected patients aged 19-44 years diagnosed with melanoma, female  
breast (breast hereafter), testicular and thyroid cancers, and patients aged 45 and older  
diagnosed with breast, prostate, lung, and colorectal cancers from the Ontario Cancer  
Registry from 1997 to 2007. Using linked administrative databases, we determined use  
and costs of chemotherapy, radiation therapy, cancer-related surgery, other  
hospitalizations and home care.

**Results:** The greatest increases from 1997 to 2007 were for melanoma, breast, colorectal,  
lung and prostate cancers ( $p < 0.05$ ). For prostate and lung cancers mean costs increased  
50% (from \$11,490 and \$22,037 to \$15,170 and \$34,473, respectively). Mean costs  
doubled for breast (from \$15,460 and \$12,909 to \$35,977 and \$29,362 for younger and  
older patients, respectively) and colorectal cancers (from \$24,769 to \$43,964) and nearly  
tripled for melanoma (from \$3,581 to \$8,934). Hospitalization-related costs accounted for  
the largest portion of total costs. The use of chemotherapy, radiation therapy and home  
care generally increased for all cancers.

**Conclusions:** The statistically significant increase in costs of initial cancer treatment is  
primarily due to more patients receiving adjuvant therapy and home care and rising  
expenditures for these and cancer-related surgeries. Understanding trends in utilization

1  
2  
3 and costs can help policy makers achieve a more accountable, high-performing health  
4  
5 care system.  
6  
7  
8  
9  
10

11  
12 **Key words:** cancer, utilization, cost, trends, initial care, Ontario  
13  
14  
15  
16  
17  
18  
19  
20  
21  
22  
23  
24  
25  
26  
27  
28  
29  
30  
31  
32  
33  
34  
35  
36  
37  
38  
39  
40  
41  
42  
43  
44  
45  
46  
47  
48  
49  
50  
51  
52  
53  
54  
55  
56  
57  
58  
59  
60

Confidential

## INTRODUCTION

The incidence of cancer in Canada has increased recently due to population growth and aging (1). This, with increased use of expensive new drugs and technologies to treat cancer, has led to a rise in cancer-related expenditures, which consume an increasing share of limited healthcare budgets (2, 3, 4).

Previous studies have shown that a large portion of cancer-related costs is incurred in the year following diagnosis (5, 6, 7). There is limited understanding of which resources and health services contribute the most to the overall cost and whether higher prices and/or greater utilization can explain the recent increase in expenditures.

We examined temporal trends in health care resource use and costs for female breast, testicular and thyroid cancers and melanoma for younger patients (aged 19 to 44 years) and female breast, prostate, lung and colorectal cancers for older patients (aged 45 years and above) to understand how patterns of care and respective costs for these cancers have changed. This age cut-off is based on previous work (there is no standard international definition of “young adult”) (8); the rationale is that it stretches from “adolescence” to menopause, in which the latter is known to induce marked changes in the cancer profile of women (8). These sites account for approximately 60% of all cancers in each age group. Our results will help shed light on current and future cancer care needs.

## METHODS

### Cohort selection

1  
2  
3 We selected patients from the Ontario Cancer Registry, the population-based registry for  
4  
5 Canada's largest province (population 13.2 million) (9). We included cancer patients 19  
6  
7 years of age or older whose first diagnosis occurred between January 1<sup>st</sup> 1997 and  
8  
9  
10 December 31<sup>st</sup> 2007 and who lived 12 months or more after diagnosis. We included  
11  
12 patients assigned a single, valid International Classification of Diseases-Oncology (ICD-  
13  
14 O) topography code for a primary cancer (female breast, (breast hereafter), thyroid,  
15  
16 testicular, and melanoma for ages 19-44, and breast, prostate, lung and colorectal for ages  
17  
18 45 and older) with no second cancer diagnosed within 90 days of the initial diagnosis. To  
19  
20 ensure our cohort represented clinical practice, the 20 most frequent histology codes for  
21  
22 each cancer were reviewed by two practicing oncologists (K.C. and W.C). We excluded  
23  
24 all patients with missing, unusual or incorrect tumour types (see Appendix, Table 1).  
25  
26  
27  
28  
29  
30  
31

### 32 **Defining Resource Categories and Costs**

33  
34 We estimated and compared trends in utilization and costs for all health care provided  
35  
36 (e.g., inpatient and outpatient hospital care, physician services, outpatient drugs,  
37  
38 diagnostic tests, home care, continuing care and long-term care) during the 12-month  
39  
40 period after diagnosis (including date of diagnosis). In addition, we examined the trends  
41  
42 in utilization and mean costs for specific cancer treatments – cancer-related surgery,  
43  
44 chemotherapy, radiation therapy (RT) and other cancer-related hospitalizations, as well as  
45  
46 home care given its growing importance in Ontario in caring for cancer patients.  
47  
48  
49  
50  
51  
52

53 RT and New Drug Funding Program (NDFP) data were obtained from Cancer Care  
54  
55 Ontario; all other administrative data – Discharge Abstract Database (DAD); National  
56  
57  
58  
59  
60

1  
2  
3 Ambulatory Care Reporting System; Continuing Care Reporting System; the Ontario  
4 Health Insurance Plan (OHIP); Ontario Drug Benefit (ODB) plan; Ontario Home Care  
5 Administrative System; Home Care Database – were obtained through the Institute for  
6 Clinical Evaluative Sciences in Toronto, Ontario (Table 1). Individual patient-level data  
7 were linked using OHIP numbers and de-identified for analyses.  
8  
9  
10  
11  
12  
13  
14  
15  
16  
17

18 We employed validated costing methods used in previous work to obtain robust estimates  
19 of utilization and costs (10). To select all cancer-related surgeries during a patient's  
20 hospitalization, we used the Canadian Classification of Diagnostic, Therapeutic, and  
21 Surgical Procedures (CCP) codes (before March 31st 2002 inclusive) and the Canadian  
22 Classification of Health Interventions (CCI) codes (after April 1<sup>st</sup> 2002 inclusive) (11).  
23  
24 As these codes are not comparable, we were not able to reliably estimate cancer-related  
25 surgeries and other hospitalizations for the 2002 calendar year. Cost estimates for other  
26 resources were available in the data or obtained from other sources (published work (12),  
27 Community Care Access Centres (13) and the Ministry of Health and Long-term Care  
28 (13)). Details are provided in the Appendix.  
29  
30  
31  
32  
33  
34  
35  
36  
37  
38  
39  
40  
41  
42

43 Costs were adjusted to 2009 Canadian dollars using the health care component of the  
44 Statistics Canada Consumer Price Index for Ontario (14).  
45  
46  
47  
48  
49

#### 50 **Analysis: Assessing Trends in Costs**

51  
52  
53  
54  
55  
56  
57  
58  
59  
60



1  
2  
3 We examined the percentage of patients receiving each treatment/modality of care  
4 described above, the respective mean cost in each year of diagnosis, and total mean costs  
5 of care for each cancer site by year of diagnosis.  
6  
7  
8  
9

10  
11  
12 We used linear regression models with percentage of patients treated and costs as the  
13 dependent variables and year as the independent variable to determine the statistical  
14 significance of trends over time. For each slope estimated, we calculated the two-sided p-  
15 values and 95% confidence intervals (CIs) through normal approximation (15, 16).  
16  
17  
18  
19

20  
21  
22 Study approval was obtained from the Research Ethics Board at the University of  
23  
24  
25  
26  
27 Toronto.  
28  
29  
30  
31  
32

## 33 34 **RESULTS**

35  
36 Our cohorts consisted of 20,821 patients 19 to 44 years of age and 178,797 patients 45  
37 years of age and older (of whom 101,426 were 65 and older). The most common cancer  
38 among younger patients was breast (44%), followed by thyroid (26%). Prostate and  
39 breast (36% and 31%, respectively) were the most common cancer sites among older  
40 patients. The younger patients were 76% female, while the older group was 54% male.  
41  
42  
43  
44  
45  
46  
47 Table 2 provides characteristics for each group.  
48  
49  
50

51  
52  
53 We found a statistically significant increase in first year post-diagnosis mean costs for  
54 melanoma, breast, lung, colorectal and prostate cancers from 1997 to 2007 ( $p < 0.05$ )  
55  
56  
57  
58  
59  
60

1  
2  
3 (Figures 1A and 1B). Among younger patients, mean costs for breast cancer more than  
4  
5 doubled from \$15,460 in 1997 to \$35,977 in 2007, while costs nearly tripled for  
6  
7 melanoma, from \$3,581 in 1997 to \$8,934 in 2007. For older patients, mean costs  
8  
9 approximately doubled for breast and colorectal cancers (from \$12,909 and \$24,769 in  
10  
11 1997 to \$29,362 and \$43,964 in 2007), and increased about 50% for prostate and lung  
12  
13 cancers (from \$11,490 and \$22,037 in 1997 to \$15,170 and \$34,471 in 2007,  
14  
15 respectively). Colorectal and lung cancers presented the largest mean total costs  
16  
17 throughout our analysis period. Overall, the greatest changes worth noting in first year  
18  
19 post-diagnosis costs occurred for breast (both age groups), colorectal and lung cancers;  
20  
21 we examine these cancers in more detail below.  
22  
23  
24  
25  
26  
27  
28  
29

### 30 *Breast Cancer*

31  
32 Chemotherapy use rose from 70% to 77% for patients aged 19-44 ( $p > 0.05$ ), and from  
33  
34 27% to roughly 43% ( $p < 0.05$ ) among patients aged 45+ (Figure 2; Tables 2A and 2B,  
35  
36 Appendix). Chemotherapy costs increased 5-fold for all patients (from \$2,286 to \$11,834  
37  
38 for patients aged 19-44,  $p < 0.05$ ; from \$791 to \$5,978 for patients 45+,  $p < 0.05$ ) (Tables  
39  
40 3A and 3B, Appendix).  
41  
42  
43  
44  
45

46 The percentage of patients 19-44 undergoing RT increased from 49% to 71% ( $p < 0.05$ )  
47  
48 (Figure 3), while corresponding expenditures tripled from \$2,067 to \$6,268 ( $p < 0.05$ ;  
49  
50 yearly rate of increase = \$393, CI = \$224 to \$563) (Table 3A, Appendix). The proportion  
51  
52 of patients 45+ receiving RT increased from 44% to 66% ( $p < 0.05$ ) (Figure 3);  
53  
54  
55  
56  
57  
58  
59  
60

1  
2  
3  
4  
5  
6  
7  
8  
9  
10  
11  
12  
13  
14  
15  
16  
17  
18  
19  
20  
21  
22  
23  
24  
25  
26  
27  
28  
29  
30  
31  
32  
33  
34  
35  
36  
37  
38  
39  
40  
41  
42  
43  
44  
45  
46  
47  
48  
49  
50  
51  
52  
53  
54  
55  
56  
57  
58  
59  
60

corresponding costs more than tripled, from \$1,620 to \$4,920 ( $p < 0.05$ ) (yearly increase = \$297, CI = \$155 to \$438) (Table 3B, Appendix).

The use of home care increased from 64% to 80% ( $p < 0.05$ ) for patients 19-44 and from 60% to 72% ( $p < 0.05$ ) for patients 45+ (Figure 4); corresponding costs increased for both age groups (Tables 3A and 3B, Appendix).

The proportion of patients undergoing cancer-related surgery remained constant at around 94% (Figure 5A). Corresponding expenditures for patients 19-44 decreased from 1997 to 2001 and increased from 2003 to 2007 (Figure 5B). For patients 45+, expenditures were similar in value and trend. The proportion of patients requiring other hospitalizations also remained relatively constant throughout our analysis period, as did corresponding costs (Tables 2A, 2B, 3A and 3B in Appendix).

### ***Colorectal Cancer***

The use of home care increased from 52% to 63% ( $p < 0.05$ ) (Figure 4); related costs followed a similar pattern, increasing from \$2,190 to \$3,679 ( $p < 0.05$ ) (Table 3B, Appendix). Although few patients received RT, both utilization and costs increased slightly over our analysis period (Figure 3; Table 3B, Appendix).

Approximately 90% of patients were treated with surgery over all years but expenditures increased significantly (Figures 5A and 5B). The proportion of patients that required

1  
2  
3 other hospitalizations remained constant around 78% before 2002 and 85% after 2002;  
4  
5 costs increased for both time periods (Tables 2B and 3B, Appendix).  
6  
7  
8  
9

10 The proportion of patients treated with chemotherapy increased slightly; respective costs  
11  
12 doubled (Figure 2A; Table 3B, Appendix).  
13  
14

### 15 16 17 *Lung*

18  
19 The proportion of patients treated with chemotherapy doubled from 18% to 36% ( $p <$   
20  
21 0.05) (Figure 2); corresponding costs more than tripled, from \$685 to \$2,576 ( $p <$  0.05)  
22  
23 (Table 3B, Appendix). The proportion of patients treated with RT increased from 24% to  
24  
25 32% while corresponding mean costs more than doubled, from \$676 to \$1,498 (Figure 3;  
26  
27 Table 3B, Appendix). The proportion of patients using home care increased from 42% to  
28  
29 52% ( $p <$  0.05) (Figure 4); respective mean costs increased from \$1,784 to \$2,236 ( $p <$   
30  
31 0.05) (Table 3B, Appendix).  
32  
33  
34  
35  
36  
37  
38

39 The proportion of patients that underwent cancer-related surgery decreased from 79% in  
40  
41 1997 to 75% in 2001 and increased from about 68% in 2003 to 73% in 2007 ( $p <$  0.05)  
42  
43 (Figure 5A). Associated mean costs were relatively constant from 1997 to 2001 (around  
44  
45 \$9,000) but increased from \$8,697 in 2003 to \$10,737 in 2007 ( $p <$  0.05) (Figure 5B).  
46  
47

48 The proportion of patients undergoing other hospitalizations decreased from 60% in 1997  
49  
50 to 55% in 2001 and remained relatively constant (around 58%) from 2003 to 2007;  
51  
52 respective mean costs remained constant before 2002 but increased from \$3,489 in 2003  
53  
54 to \$4,472 in 2007 (Tables 2B and 3B, Appendix).  
55  
56  
57  
58  
59  
60

## INTERPRETATION

We found statistically significant increases in mean total costs for breast, prostate, lung and colorectal cancers in Ontario from 1997 to 2007 for patients who lived at least 1 year post-diagnosis (i.e. medium- and long-term survivors). Among younger patients, mean costs for breast cancer more than doubled; for older patients, mean costs approximately doubled for breast and colorectal cancers and increased about 50% for prostate and lung cancers.

These increases were due in part to increased chemotherapy and RT utilization; this is concordant with findings from the US (7, 17). Higher use of home care and rising expenditures for cancer-related surgeries also contributed to this increase. Patterns of care and practice tend to be similar in other Canadian provinces and other developed countries; thus, these findings are likely extendable Canada-wide and mirror patterns of care for other developed countries.

Chemotherapy use increased over time, particularly for younger breast cancer and older lung cancer patients. This could be due to more patients receiving adjuvant chemotherapy, which has been clinically proven to increase patient survival (18, 19, 20). Furthermore, treatments with personalized medicine and biologic agents, which are often more expensive than traditional chemotherapy agents, have increased in use (21).

1  
2  
3 The increase in RT utilization and costs, in particular for breast cancer (all ages), is likely  
4 due to increased availability, changes in patterns of care and more sophisticated methods,  
5 like conformal and intensity-modulated RT. For example, oncologists have increasingly  
6 used adjuvant RT in breast cancer patients who undergo breast conserving surgery (i.e.,  
7 lumpectomy), a procedure that increased during our analysis period (22).

8  
9  
10  
11  
12  
13  
14  
15  
16  
17 Hospitalizations (cancer-related surgeries and other) accounted for the largest portion of  
18 expenditures during the initial phase of care. For most cancers, the proportion of patients  
19 undergoing cancer-related surgeries remained relatively constant over time, although the  
20 trend for breast cancer patients may have been slightly different had we included same-  
21 day procedures for breast-conserving surgery. Surgery-related expenditures generally  
22 increased, in particular for breast, colorectal and lung cancers, suggesting an increase in  
23 price, likely due to the use of more advanced and expensive surgical techniques, such as  
24 laparoscopic and robotic surgeries.  
25  
26  
27  
28  
29  
30  
31  
32  
33  
34  
35  
36  
37  
38  
39  
40  
41  
42  
43  
44  
45  
46  
47  
48  
49  
50  
51  
52  
53  
54  
55  
56  
57  
58  
59  
60

A particularly interesting finding is the increased use of home care, especially among  
older patients. Post-acute home care is typically used for cancer patients in the first thirty  
days following hospital discharge (13). This is the direction the Ontario government is  
moving towards (23).

Little research has been done on the trends of cancer care and associated costs. Warren et  
al. (2008) reported statistically significant increases in the costs of initial care for patients  
65 and older for breast, lung and colorectal cancers from 1991 to 2002 in the US, with  
lung and colorectal being the most costly overall (7). They found that hospitalization

1  
2  
3 costs accounted for the largest portion of the overall cost and RT use generally increased.  
4  
5 Our findings are similar but our cost estimates for each treatment category are lower  
6  
7 possibly due to differences in analysis periods (their initial phase of care included 2  
8  
9 months pre-diagnosis and 12 months post-diagnosis), unit costs, patient age and, in some  
10  
11 instances, differences in patterns of care. When we restricted our sample to patients aged  
12  
13 65 and older, our results were qualitatively the same although utilization and costs were  
14  
15 slightly higher than the overall results.  
16  
17  
18  
19

### 20 21 22 **Strengths**

23  
24 Our study included patients younger than 65, an age group rarely studied, and compared  
25  
26 many different cancer sites, thus providing direct comparability of their relative costs  
27  
28 previously not readily available in the literature. We made use of rich administrative data,  
29  
30 detailed costing methods, and a large population-based sample of all adults in Ontario.  
31  
32 Our study is one of the few to use Ontario administrative data to examine trends in  
33  
34 cancer-related expenditures.  
35  
36  
37  
38  
39  
40

### 41 **Limitations**

42  
43 We examined only the most prevalent cancer sites for two age groups, and highlighted a  
44  
45 select group of cancer-related resources. There were some limitations with the data,  
46  
47 including a change in procedural-related coding systems such that we could not examine  
48  
49 hospitalizations for 2002. Our chemotherapy estimates were based on OHIP physician  
50  
51 claims and may underestimate actual utilization, and our cost of RT is based on a dated  
52  
53 estimate. In addition, the ODB only covers patients aged 65 and over and special cases.  
54  
55  
56  
57  
58  
59  
60

1  
2  
3 Finally, we did not look beyond the first year post-diagnosis and may have included  
4  
5 (high) costs of the pre-death period for some patients. This is likely to be of concern for  
6  
7  
8 cancers with short survival (colorectal and lung cancers).  
9

## 10 11 12 **Conclusions**

13  
14  
15 We found statistically significant increases in the costs of initial treatment for most  
16  
17 cancer sites in Ontario from 1997 to 2007 for two age groups of patients. The greatest  
18  
19 changes occurred for breast, colorectal and lung cancers, primarily due to more patients  
20  
21 receiving adjuvant therapy and home care and rising expenditures for these services and  
22  
23 cancer-related surgeries. As expenditures continue to rise, it is important to determine the  
24  
25 drivers behind this increase. Chemotherapy will likely place a strain on the Ontario health  
26  
27 care budget, although there is potential to reduce costs. For example, tailoring of  
28  
29 personalised medicine and the use of gene expression profiling among women with breast  
30  
31 cancer can be cost-saving (24, 25).  
32  
33  
34  
35  
36  
37  
38

39 Understanding the trends in utilization and costs is particularly important for planning  
40  
41 and resource allocation. Our robust estimates of trends in cancer-related expenditures can  
42  
43 aid policy makers' decisions, and serve as important inputs for researchers interested in  
44  
45 modelling cost implications of emerging technologies and practices in Canada and other  
46  
47 developed countries.  
48  
49  
50  
51  
52  
53  
54  
55  
56  
57  
58  
59  
60



**REFERENCES**

1. Canadian Cancer Society's Steering Committee on Cancer Statistics. *Canadian Cancer Statistics 2012*. Toronto, ON: Canadian Cancer Society; 2012.
2. Constant A, Benda MC, Ariste R and Mallory CD. Is the price of cancer treatment falling? Applied Research and Analysis Directorate, Health Policy Branch Working Paper. 2006, Health Canada.
3. Health Canada. Progress Report on Cancer Control in Canada. Ottawa: Health Canada, 2004.
4. National Cancer Institute of Canada: *Canadian Cancer Statistics 2004*, Toronto, Canada, 2004.
5. Brown ML, Riley GF, Schussler N, Etzioni R. Estimating health care costs related to cancer treatment from SEER-Medicare data. *Medical Care*. 2002; 40(8 Suppl): IV-104-117.
6. Warren JL, Brown ML, Fay MP, Schussler N, Potosky AL, Riley GF. Costs of treatment for elderly women with early-stage breast cancer in fee-for-service settings. *Journal of Clinical Oncology*. 2002; 20 (1): 307–316.

- 1  
2  
3  
4  
5  
6  
7  
8  
9  
10  
11  
12  
13  
14  
15  
16  
17  
18  
19  
20  
21  
22  
23  
24  
25  
26  
27  
28  
29  
30  
31  
32  
33  
34  
35  
36  
37  
38  
39  
40  
41  
42  
43  
44  
45  
46  
47  
48  
49  
50  
51  
52  
53  
54  
55  
56  
57  
58  
59  
60
7. Warren JL, Yabroff KR, Meekins A, Topor M, Lamont EB, Brown ML. Evaluation of trends in the cost of initial cancer treatment. *Journal of the National Cancer Institute*. 2008; 100(12): 888-897.
  8. “Cancer Care Ontario: *Cancer in Young Adults in Canada*, Toronto, Canada, 2006.” 2006, ISBN 0-921325-10-X (print), ISBN 0-921325-11-8 (PDF).
  9. Hall S, Schulze K, Groome P, McKillop W, Holowaty E. Using cancer registry data for survival studies: the example of the Ontario Cancer Registry. *Journal of Clinical Epidemiology*. 2006; 59:67-76.
  10. de Oliveira C, Bremner K, Pataky R, Gunraj N, Chan K, Peacock S, Krahn M. The Costs of Cancer Care before and after Diagnosis for the 21 Most Common Cancers in Ontario. *Canadian Medical Association Journal Open*. 2013; 1(1): E1 – E8.
  11. Canadian Institute for Health Information, *Coding Standards for Version 2009 ICD-10-CA and CCI, Revised September 2009* (Ottawa, Ont.: CIHI, 2009).
  12. Earle C, Coyle D, Smith A, Agboola O, Evans WK. The cost of radiotherapy at an Ontario Regional cancer centre: a reevaluation. *Critical Reviews in Oncology/Hematology*. 1999; 32: 87–93.

- 1  
2  
3  
4  
5  
6  
7  
8  
9  
10  
11  
12  
13  
14  
15  
16  
17  
18  
19  
20  
21  
22  
23  
24  
25  
26  
27  
28  
29  
30  
31  
32  
33  
34  
35  
36  
37  
38  
39  
40  
41  
42  
43  
44  
45  
46  
47  
48  
49  
50  
51  
52  
53  
54  
55  
56  
57  
58  
59  
60
13. Wodchis WP, Bushmeneva K, Nikitovic M, McKillop I. Guidelines on Person-Level Costing Using Administrative Databases in Ontario. Toronto: Health System Performance Research Network; 2011.
  14. Statistics Canada. The Consumer Price Index, Catalogue no. 62-001-X, vol. 91, no. 1, 2012.
  15. Brown ML, Riley GF, Potosky AL, Etzioni RD. Obtaining long-term disease specific costs of care: application to Medicare enrollees diagnosed with colorectal cancer. *Medical Care*. 1999; 37(12): 1249-59.
  16. Yabroff KR, Lamont EB, Mariotto A, Warren JL, Topor M, Meekins A, Brown ML. Cost of care for elderly cancer patients in the United States. *Journal of the National Cancer Institute*. 2008; 100(9):630-641.
  17. Lang K, Marciniak MD, Faries D, Stokes M, Buesching D, Earle C, Treat J, Morissette N, Thompson D. Trends and predictors of first-line chemotherapy use among elderly patients with advanced non-small cell lung cancer in the United States. *Lung Cancer*. 2009; 63(2): 264-270.
  18. Palmieri C, Jones A. The 2011 EBCTCG polychemotherapy overview. *The Lancet*. 2012; 379(9814): 390-392.

- 1  
2  
3  
4  
5  
6 19. Thierry A, Corrado B, Mounedji-Boudiaf L, Navarro M, Tabernero J, Hickish T,  
7  
8 Topham C, Zaninelli M, Clingan P, Bridgewater J, Tabah-Fisch I, de Gramont A  
9  
10 for the Multicenter International Study of Oxaliplatin/5-Fluorouracil/Leucovorin  
11  
12 in the Adjuvant Treatment of Colon Cancer (MOSAIC) Investigators. Oxaliplatin,  
13  
14 Fluorouracil, and Leucovorin as Adjuvant Treatment for Colon Cancer. New  
15  
16 England Journal of Medicine. 2004; 350:2343-2351.  
17  
18  
19  
20  
21  
22 20. Kirkwood JM, Ibrahim JG, Sosman JA, Sondak VK, Agarwala SS, Ernstoff  
23  
24 MS, Rao U. High-dose interferon alfa-2b significantly prolongs relapse-free and  
25  
26 overall survival compared with the GM2-KLH/QS-21 vaccine in patients with  
27  
28 resected stage IIB-III melanoma: Results of Intergroup Trial. Journal of Clinical  
29  
30 Oncology. 2001; 19: 2370-2380.  
31  
32  
33  
34  
35  
36 21. Canadian Partnership Against Cancer. The Future of Cancer Control in Canada -  
37  
38 A discussion paper on pan-Canadian cancer control priorities for 2012-2017.  
39  
40 Toronto: Canadian Partnership Against Cancer, 2011.  
41  
42  
43  
44  
45  
46 22. Fisher B, Anderson S, Bryant J Margolese RG, Deutsch M, Fisher ER, Jeong  
47  
48 JH, Wolmark N. Twenty-year follow-up of a randomized trial comparing total  
49  
50 mastectomy, lumpectomy, and lymphectomy plus irradiation for the treatment of  
51  
52 invasive breast cancer. New England Journal of Medicine. 2002; 347(16):1233-  
53  
54 41.  
55  
56  
57  
58  
59  
60

- 1  
2  
3  
4  
5  
6  
7  
8  
9  
10  
11  
12  
13  
14  
15  
16  
17  
18  
19  
20  
21  
22  
23  
24  
25  
26  
27  
28  
29  
30  
31  
32  
33  
34  
35  
36  
37  
38  
39  
40  
41  
42  
43  
44  
45  
46  
47  
48  
49  
50  
51  
52  
53  
54  
55  
56  
57  
58  
59  
60
23. Ontario Ministry of Health and Long-term Care. News Release Ontario Helping More Seniors Live at Home Longer [Internet]. Available: [http://www.health.gov.on.ca/en/news/release/2012/may/nr\\_20120524\\_1.aspx](http://www.health.gov.on.ca/en/news/release/2012/may/nr_20120524_1.aspx) (accessed November 29 2012).
24. Aspinall MG, Hamermesh RG. Realizing the Promise of Personalized Medicine. *Harvard Business Review*. 2007; 85 (10):108-117.
25. Armstrong K. Can genomics bend the cost curve? *Journal of the American Medical Association*. 2012; 307(10):1031-1032.

1  
2  
3  
4  
5  
6  
7  
8  
9  
10  
11  
12  
13  
14  
15  
16  
17  
18  
19  
20  
21  
22  
23  
24  
25  
26  
27  
28  
29  
30  
31  
32  
33  
34  
35  
36  
37  
38  
39  
40  
41  
42  
43  
44  
45  
46  
47  
48  
49  
50  
51  
52  
53  
54  
55  
56  
57  
58  
59  
60

## TABLES AND FIGURES

**Table 1** – Databases<sup>1</sup> and resources

| Database                                              | Resources                                                                                                        |
|-------------------------------------------------------|------------------------------------------------------------------------------------------------------------------|
| New Drug Funding Program                              | chemotherapy drugs                                                                                               |
| Activity Level Reporting System                       | radiation therapy                                                                                                |
| Ontario Health Insurance Plan Claims History Database | diagnostic tests, physician services, chemotherapy visits, emergency department visits pre-2002                  |
| Ontario Drug Benefit plan data                        | outpatient prescription drugs for patients aged $\geq 65$ , oral anti-neoplastic drugs, long-term care indicator |
| CIHI-Discharge Abstract Database                      | inpatient hospitalizations (cancer-related surgeries and other hospitalization), same-day surgery pre-2002       |
| CIHI-National Ambulatory Care Reporting System        | emergency department visits post-2002; same-day surgery post-2002                                                |
| Continuing Care Reporting System                      | stays in complex continuing care facilities                                                                      |
| Ontario Home Care Administrative System               | home care pre-April 2005                                                                                         |
| Home Care Database                                    | home care post-April 2005                                                                                        |

<sup>1</sup> All databases were available at the Institute for Clinical Evaluative Sciences, Toronto, Ontario, Canada, with the exception of the New Drug Funding Program and Activity Level Reporting System which were obtained from Cancer Care Ontario.

**Legend:**

CIHI – Canadian Institute for Health Information

**Table 2** – Characteristics of cancer patients by age group

| <b>Characteristic</b>                | <b>Patients under age<br/>45 years</b> | <b>Patients 45 years<br/>and older</b> |
|--------------------------------------|----------------------------------------|----------------------------------------|
| Type of cancer, n (%)                |                                        |                                        |
| Female Breast                        | 9,147 (43.9)                           | 55,670 (31.1)                          |
| Thyroid                              | 5,394 (25.9)                           | --                                     |
| Melanoma                             | 3,816 (18.3)                           | --                                     |
| Testis                               | 2,464 (11.8)                           | --                                     |
| Lung                                 | --                                     | 14,372 ( 8.0)                          |
| Colorectal                           | --                                     | 43,621 (24.4)                          |
| Prostate                             | --                                     | 65,134 (36.4)                          |
| Age at diagnosis                     |                                        |                                        |
| Mean                                 | 36.5                                   | 66.2                                   |
| Median                               | 38                                     | 66                                     |
| Sex                                  |                                        |                                        |
| Female, n (%)                        | 15,882 (76.3)                          | 82,266 (46)                            |
| Male, n (%)                          | 4,939 (23.7)                           | 96,531 (54)                            |
| Neighbourhood income quintile, n (%) |                                        |                                        |
| Missing                              | 105 (0.5)                              | 712 (0.4)                              |
| 1 (low)                              | 3,520 (16.9)                           | 31,330 (17.5)                          |
| 2 (medium-low)                       | 3,917 (18.8)                           | 35,712 (20.1)                          |
| 3 (medium)                           | 4,224 (20.3)                           | 35,308 (19.7)                          |
| 4 (medium-high)                      | 4,428 (21.3)                           | 36,006 (20.1)                          |
| 5 (high)                             | 4,627 (22.2)                           | 39,729 (22.2)                          |
| Rural residence, n (%)               | 2,202 (10.6)                           | 27,274 (15.3)                          |

1  
2  
3 **Figure Legends**  
4

5  
6 **Figure 1A** – Trends in mean cost in constant 2009 dollars during the initial year after  
7 diagnosis for patients under age of 45 (error bars are 95% confidence intervals)  
8

9  
10 **Figure 1B** – Trends in mean cost in constant 2009 dollars during the initial year after  
11 diagnosis for patients age 45 years and older (error bars are 95% confidence intervals)  
12

13 **Figure 2** – Trends in the percentage of patients receiving chemotherapy during the initial  
14 year of treatment  
15

16 **Figure 3** – Trends in the percentage of patients receiving radiation therapy during the  
17 initial year of treatment  
18

19  
20 **Figure 4** – Trends in the percentage of patients receiving home care during the initial  
21 year of treatment  
22

23 **Figures 5A and B** – Trends in (A) the percentage of patients undergoing cancer-related  
24 surgery and (B) the mean cost in constant 2009 dollars during the initial year of treatment  
25  
26  
27  
28  
29  
30  
31  
32  
33  
34  
35  
36  
37  
38  
39  
40  
41  
42  
43  
44  
45  
46  
47  
48  
49  
50  
51  
52  
53  
54  
55  
56  
57  
58  
59  
60



Figure 1A

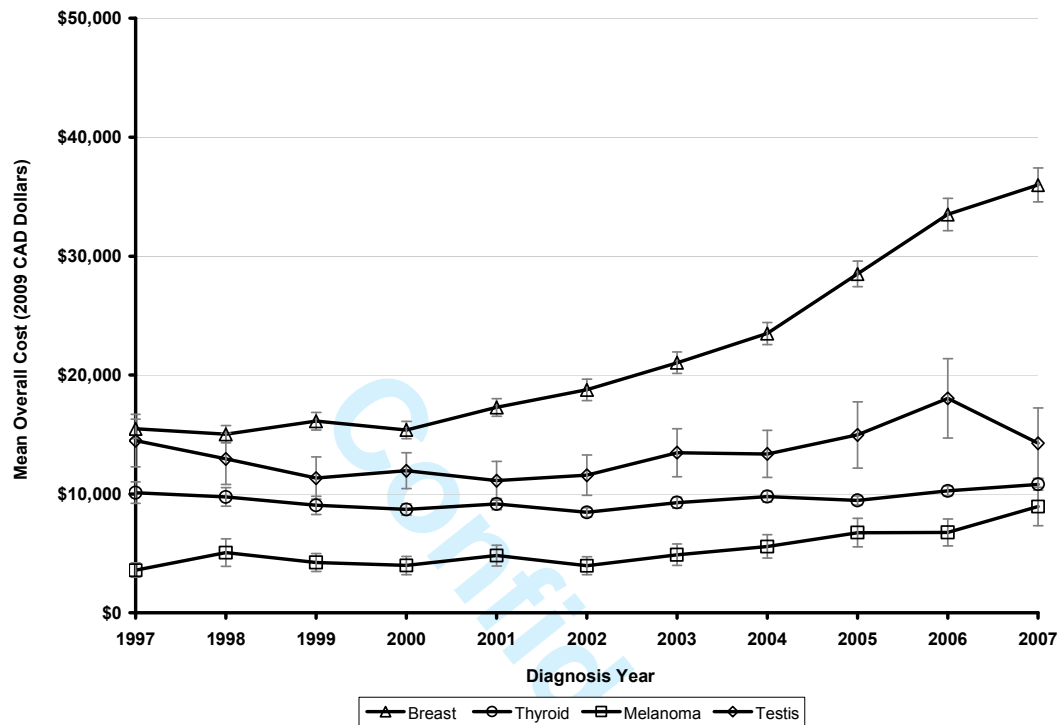

Parameter estimates for the slopes provide the rate at which expenditures are increasing over time; these are as follows: breast \$2,125 per year, 95% confidence interval (CI) [1477; 2773],  $p < 0.0001$ ; testis \$320 per year, 95% CI [-63; 703],  $p = 0.0911$ ; thyroid \$81 per year, 95% CI [-69; 231],  $p = 0.2522$ ; melanoma \$401 per year, 95% [200; 601],  $p = 0.0014$ .

1  
2  
3  
4  
5  
6  
7  
8  
9  
10  
11  
12  
13  
14  
15  
16  
17  
18  
19  
20  
21  
22  
23  
24  
25  
26  
27  
28  
29  
30  
31  
32  
33  
34  
35  
36  
37  
38  
39  
40  
41  
42  
43  
44  
45  
46  
47  
48  
49  
50  
51  
52  
53  
54  
55  
56  
57  
58  
59  
60

Figure 1B

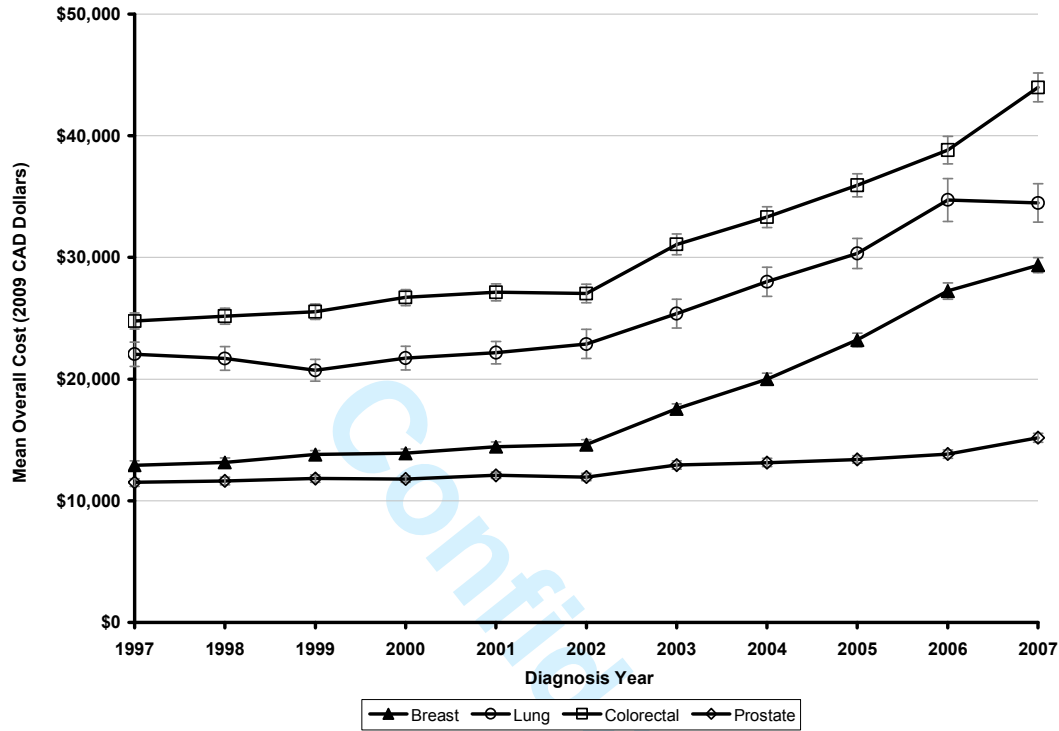

Parameter estimates for the slopes provide the rate at which expenditures are increasing over time; these are as follows: breast \$1,666 per year, 95% confidence interval (CI) [1182; 2150],  $p < 0.0001$ ; prostate \$333 per year, 95% CI [206; 460],  $p = 0.0002$ ; lung \$1,509 per year, 95% CI [966; 2053],  $p = 0.0001$ ; colorectal \$1,856 per year, 95% [1499; 2213],  $p < 0.0001$ .

Figure 2

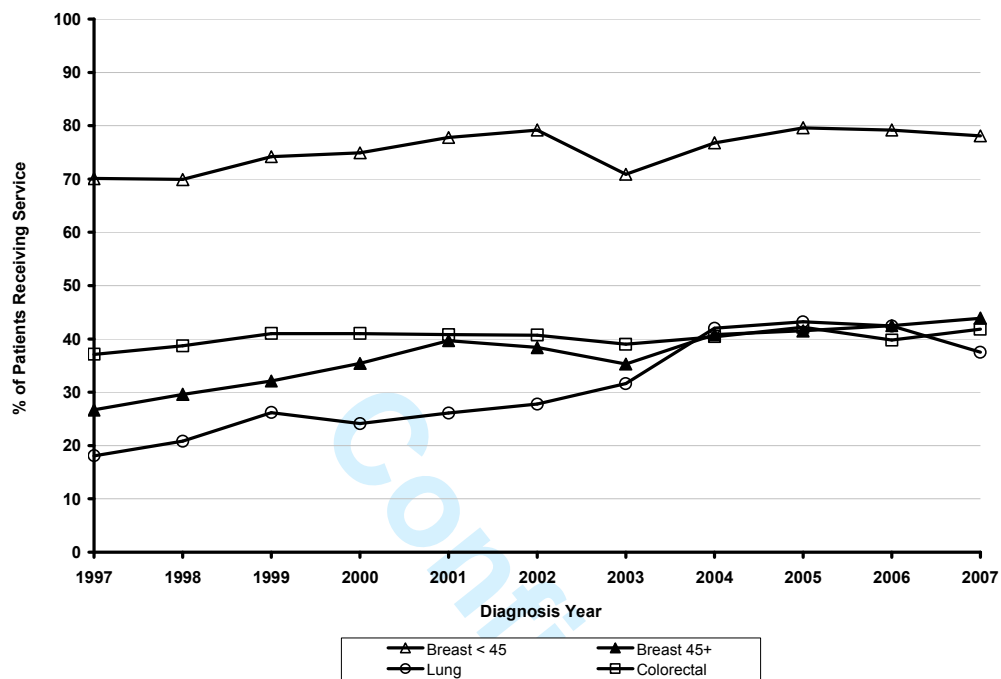

1  
2  
3  
4  
5  
6  
7  
8  
9  
10  
11  
12  
13  
14  
15  
16  
17  
18  
19  
20  
21  
22  
23  
24  
25  
26  
27  
28  
29  
30  
31  
32  
33  
34  
35  
36  
37  
38  
39  
40  
41  
42  
43  
44  
45  
46  
47  
48  
49  
50  
51  
52  
53  
54  
55  
56  
57  
58  
59  
60

Figure 3

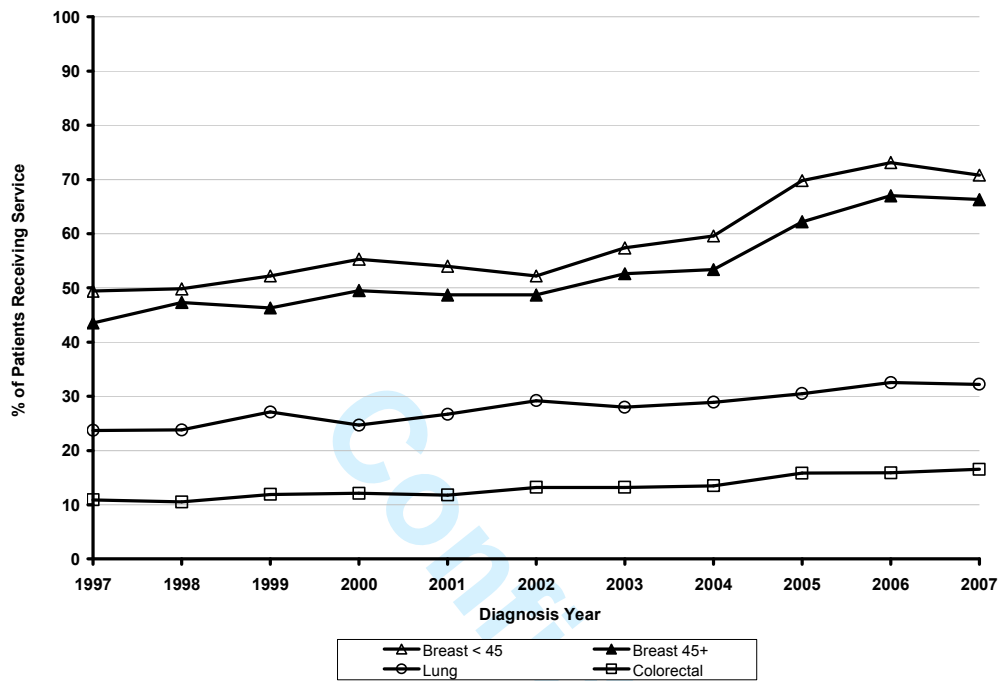

Figure 4

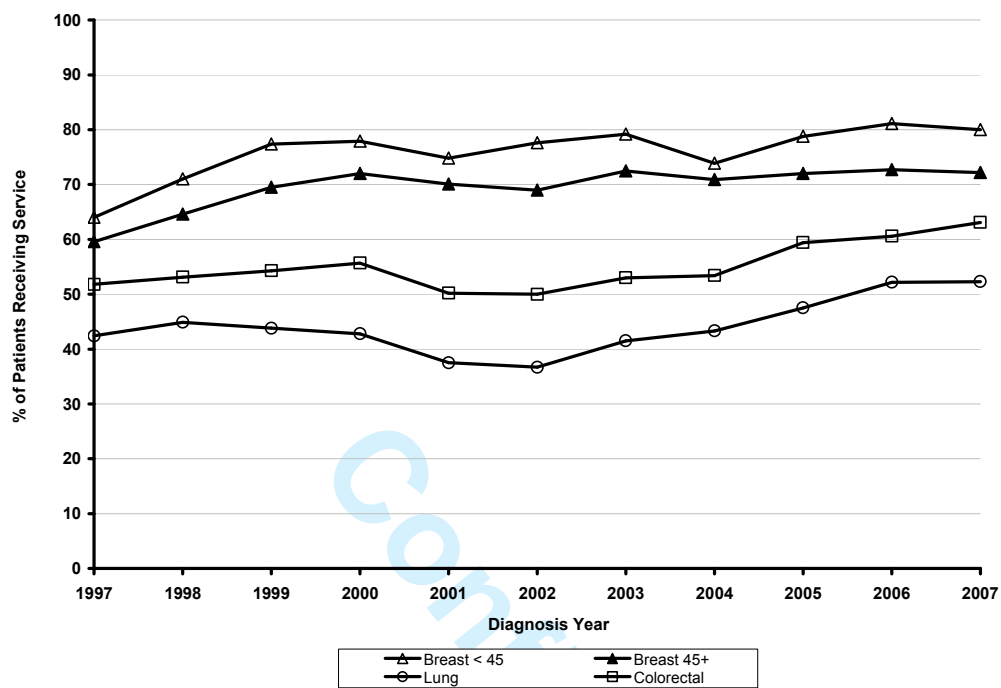

1  
2  
3  
4  
5  
6  
7  
8  
9  
10  
11  
12  
13  
14  
15  
16  
17  
18  
19  
20  
21  
22  
23  
24  
25  
26  
27  
28  
29  
30  
31  
32  
33  
34  
35  
36  
37  
38  
39  
40  
41  
42  
43  
44  
45  
46  
47  
48  
49  
50  
51  
52  
53  
54  
55  
56  
57  
58  
59  
60

Figures 5A and B

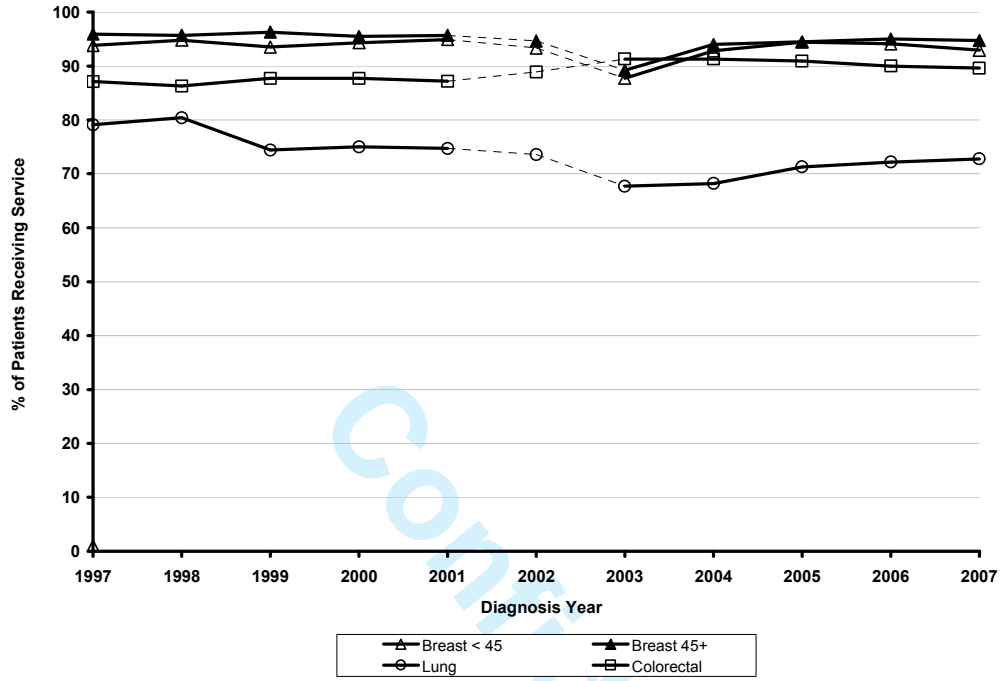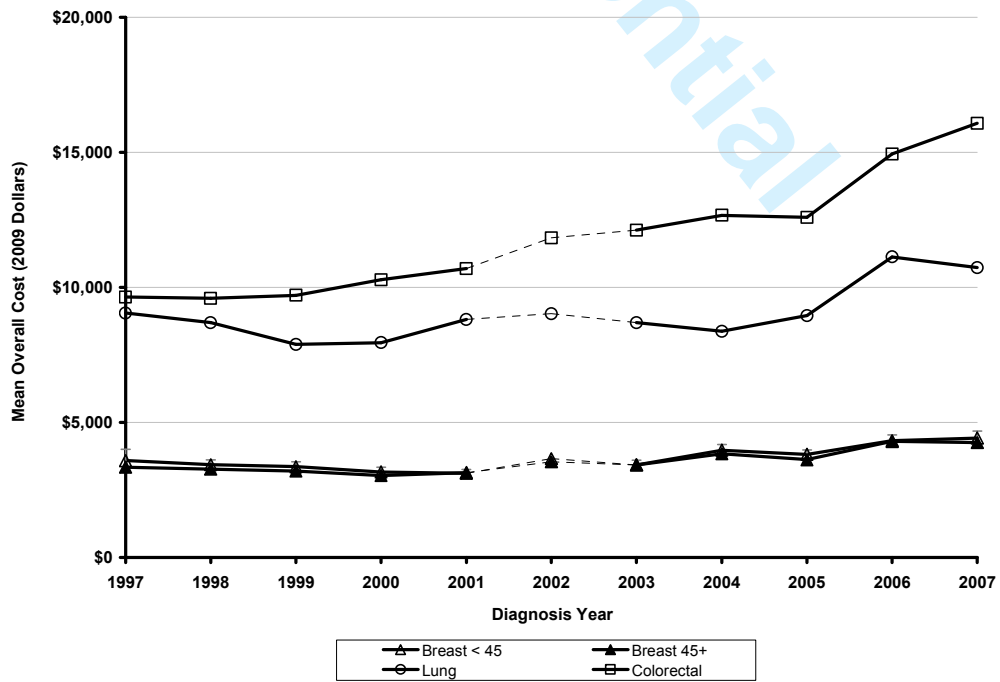

**Note:** The data point for 2002 was obtained through linear interpolation; we do not have reliable data for this year.

## Appendix 1 – Cancer and Histology Codes

**Table 1.** ICD-0 and included histology codes

| Cancer        | ICD-O Code(s)                                   | Included Histologies                                                                                                   |
|---------------|-------------------------------------------------|------------------------------------------------------------------------------------------------------------------------|
| Colorectal    | C18.0, C18.2 – C18.9<br>C19.9<br>C20.9<br>C21.8 | 8000, 8010, 8020, 8070, 8140, 8144, 8210, 8211, 8221, 8240, 8246, 8260, 8261, 8262, 8263, 8310, 8480, 8481, 8490, 8510 |
| Lung          | C33.9<br>C34.*                                  | 8000, 8010, 8012, 8020, 8040, 8042, 8046, 8070–8072, 8140, 8240, 8246, 8250, 8255, 8260, 8480, 8481, 8550, 8560        |
| Melanoma      | C44.*                                           | 8720 – 8790<br>(with or without ICD-10 code C44.*)                                                                     |
| Female breast | C50.* (female)                                  | 8000, 8010, 8050, 8140, 8211, 8480, 8500, 8501, 8503, 8504, 8510, 8520–8524, 8530, 8541, 8543, 8575                    |
| Prostate      | C61.9                                           | 8000, 8010, 8041, 8046, 8070, 8130, 8140, 8145, 8201, 8255, 8260, 8310, 8340, 8341, 8380, 8480, 8481, 8490, 8500, 8550 |
| Testis        | C62.*                                           | 8000, 8001, 8010, 8140, 8650, 8940, 9061, 9062–9065, 9070, 9071, 9080, 9081, 9083, 9085, 9100, 9101, 9364              |
| Thyroid       | C73.9                                           | 8000, 8010, 8021, 8050, 8070, 8071, 8140, 8260, 8290, 8330, 8331, 8335, 8337, 8340–8344, 8350, 8510                    |

Legend: ICD-O – International Classification of Disease-Oncology

## Appendix 2– Costing Methodology

### *Chemotherapy*

We used 3 sources to determine chemotherapy use: the Ontario Health Insurance Plan (OHIP), the New Drug Funding Program (NDFP) and the Ontario Drug Benefit (ODB) program databases. We used physicians' billings for chemotherapy injections from the OHIP database to identify the number of chemotherapy visits. This database only includes the cost of chemotherapy administration by the physician; other costs associated with chemotherapy visits (drugs, supplies, nursing services) were estimated from the Canadian Institute for Health Information (CIHI) National Ambulatory Care Reporting System (NACRS) data (available from 2002/03 onwards) using the resource intensity weight (RIW) methodology (1, 2, 3). RIWs are estimated annually by the CIHI and represent the relative costs of different types of patient. We multiplied the RIW associated with each chemotherapy visit by the average provincial cost per weighted case to obtain the total cost for all visits from 2003 onwards and applied the average 2003 value to all chemotherapy visits that occurred in the pre-2003 period. We also obtained data on the dosages and costs of expensive chemotherapy drugs covered under the NDFP and oral anti-neoplastic drugs covered under the ODB program from their respective databases.

### *Radiation Therapy*

We obtained information on RT using the Activity Level Reporting data from CCO. Each record has a National Hospital Productivity Improvement Project (NHPIP) code. We estimated the cost per NHPIP unit as \$8.03 in 1995/96 from published Ontario data (4);



1  
2  
3 this includes salaries and benefits for secretaries, nurses, physicists, therapists, and the  
4  
5 cost of equipment, supplies, and services.  
6  
7

### 8 9 10 *Inpatient Hospitalizations*

11  
12 The frequency and type of inpatient hospitalizations were obtained from the CIHI  
13  
14 Discharge Abstract Database (DAD). We used the Canadian Classification of Diagnostic,  
15  
16 Therapeutic, and Surgical Procedures (CCP) codes (before March 31st 2002 inclusive)  
17  
18 and the Canadian Classification of Health Interventions (CCI) codes (after April 1<sup>st</sup> 2002  
19  
20 inclusive) (13) to select all cancer-related surgeries during a patient's hospitalization. All  
21  
22 other inpatient stays that did not include a cancer-related surgery ("other  
23  
24 hospitalizations") were also obtained from the DAD. The costs of all hospitalizations  
25  
26 were estimated using the RIW methodology (1, 2, 3). As the CCP and CCI codes are not  
27  
28 comparable, we were not able to obtain reliable estimates of cancer-related surgeries and  
29  
30 other hospitalizations for the 2002 calendar year.  
31  
32  
33  
34  
35  
36  
37  
38

### 39 *Home Care*

40  
41 We estimated the frequency, duration and type of home care service from the Ontario  
42  
43 Home Care Administrative System (pre-April 2005) and the Home Care Database (post-  
44  
45 April 2005). Unit costs were obtained from the Community Care Access Centres,  
46  
47 Toronto (5).  
48  
49  
50

### 51 52 *Ambulatory Care (Same-day Surgery and Emergency Department Visits)*

1  
2  
3 The NACRS contains administrative, clinical, financial, and demographic data for  
4 hospital-based ambulatory care, including same day surgery (SDS), emergency  
5 department (ED) visits, medical day/night care, and high-cost ambulatory clinics, and is  
6 available from 2002/03 onwards. We used the NACRS data to estimate utilization from  
7 2002/2003 onwards for SDS and ED visits and the RIW methodology to estimate costs  
8 (1, 2, 3). For the pre-NACRS period, the number of SDS was determined from the DAD  
9 while the number of ED visits was estimated from the OHIP claims history database. The  
10 RIW methodology was employed to determine the costs for SDS visits identified before  
11 2002 (1-3); we applied the average 2002 cost for ED visits prior to 2002.  
12  
13  
14  
15  
16  
17  
18  
19  
20  
21  
22  
23  
24  
25  
26

### 27 *Outpatient Drugs*

28 Individuals aged 65 years and older, long-term care residents, individuals receiving home  
29 care and other selected groups are eligible for prescription drug coverage under the ODB  
30 Plan. We estimated the quantity and cost of outpatient prescription drugs for all covered  
31 patients from the ODB Plan records.  
32  
33  
34  
35  
36  
37  
38  
39  
40

### 41 *Complex Continuing Care (CCC)*

42 The frequency and length of stay in a CCC facility were obtained from the Continuing  
43 Care Reporting System data. We estimated the cost of each stay by multiplying the length  
44 of stay in days by the average case mix index (a diagnosis-related group weight) per  
45 patient-stay and the cost per weighted day for chronic care (5).  
46  
47  
48  
49  
50  
51  
52  
53  
54

### 55 *Long-term Care (LTC)*

1  
2  
3 We estimated the time spent in LTC facilities using the LTC flag in the Ontario Drug  
4 Benefit Plan database. We dated the onset of LTC from the first of three consecutive  
5 LTC-flagged drug claims and dated the cessation of LTC from the first of three  
6 consecutive non-LTC flagged drug claims to obtain the length of stay. The costs  
7 associated with nursing, food and programming for LTC residents are covered by the  
8 Ministry of Health and Long-term Care (5).  
9  
10  
11  
12  
13  
14  
15  
16  
17  
18  
19

### 20 *Diagnostic Tests and Physician Services*

21  
22 We obtained the number of diagnostic tests and their respective cost from the OHIP data.  
23  
24 We divided the cost into technical and professional components. The technical  
25 component was included in the cost of diagnostic tests while the professional component  
26 was included in the cost incurred with physician services. The number of all physician  
27 services and respective payments were estimated from the claims history database of the  
28 OHIP.  
29  
30  
31  
32  
33  
34  
35  
36  
37  
38  
39  
40  
41  
42  
43  
44  
45  
46  
47  
48  
49  
50  
51  
52  
53  
54  
55  
56  
57  
58  
59  
60

We used the health care component of the Statistics Canada Consumer Price Index for Ontario to adjust for inflation and reported all costs in 2009 Canadian dollars.

**REFERENCES**

1. Canadian Coordinating Office for Health Technology Assessment. A Guidance Document for the Costing Process, Version 1.0. Ottawa: CADTH, 1996.
2. Canadian Institute of Health Information. Resource Intensity Weights. Summary of Methodology 1995/96. Ottawa: The Institute; 1995: 1–75.
3. Pink GH, Bolley HB. Physicians in health care management: 3: case mix groups and resource intensity weights: an overview for physicians. Canadian Medical Association Journal. 1994; 150: 889–94.
4. Earle C, Coyle D, Smith A, Agboola O, Evans WK. The cost of radiotherapy at an Ontario Regional cancer centre: a reevaluation. Critical Reviews in Oncology/Hematology. 1999; 32: 87–93.
5. Wodchis WP, Bushmeneva K, Nikitovic M, McKillop I. Guidelines on Person-Level Costing Using Administrative Databases in Ontario. Toronto: Health System Performance Research Network; 2011.

## Appendix 3 – Supplementary Tables

**Table 2A.** Number and percentage of patients under age 45 years at diagnosis for specific cancer services by cancer site and year of diagnosis

|                                 | Year of Diagnosis |            |            |            |            |            |            |            |            |            |            | Total       |
|---------------------------------|-------------------|------------|------------|------------|------------|------------|------------|------------|------------|------------|------------|-------------|
|                                 | 1997              | 1998       | 1999       | 2000       | 2001       | 2002       | 2003       | 2004       | 2005       | 2006       | 2007       |             |
| <b>BREAST</b>                   |                   |            |            |            |            |            |            |            |            |            |            |             |
| <i>Total number of patients</i> | 810               | 808        | 826        | 805        | 802        | 814        | 795        | 884        | 930        | 861        | 812        | 9147        |
| Cancer-directed surgery         | 760 (93.8)        | 766 (94.8) | 772 (93.5) | 759 (94.3) | 761 (94.9) | --         | 697 (87.7) | 820 (92.8) | 878 (94.4) | 810 (94.1) | 754 (92.9) | 8346 (91.2) |
| Chemotherapy                    | 568 (70.1)        | 565 (69.9) | 613 (74.2) | 603 (74.9) | 624 (77.8) | 645 (79.2) | 564 (70.9) | 679 (76.8) | 740 (79.6) | 682 (79.2) | 634 (78.1) | 6917 (75.6) |
| Radiation therapy               | 400 (49.4)        | 402 (49.8) | 431 (52.2) | 445 (55.3) | 433 (54)   | 425 (52.2) | 456 (57.4) | 527 (59.6) | 649 (69.8) | 629 (73.1) | 575 (70.8) | 5372 (58.7) |
| Other hospitalizations          | 214 (26.4)        | 205 (25.4) | 218 (26.4) | 207 (25.7) | 194 (24.2) | --         | 216 (27.2) | 242 (27.4) | 251 (27)   | 246 (28.6) | 249 (30.7) | 2438 (26.7) |
| Home care                       | 518 (64)          | 574 (71)   | 639 (77.4) | 627 (77.9) | 600 (74.8) | 632 (77.6) | 630 (79.2) | 653 (73.9) | 731 (78.6) | 697 (81)   | 650 (80)   | 6951 (76)   |
| <b>THYROID</b>                  |                   |            |            |            |            |            |            |            |            |            |            |             |
| <i>Total number of patients</i> | 326               | 309        | 365        | 402        | 456        | 526        | 479        | 587        | 612        | 658        | 674        | 5394        |
| Cancer-directed surgery         | 260 (79.8)        | 248 (80.3) | 300 (82.2) | 317 (78.9) | 369 (80.9) | --         | 454 (94.8) | 560 (95.4) | 590 (96.4) | 638 (97)   | 660 (97.9) | 4872 (90.3) |
| Chemotherapy                    | 0 (0)             | 0 (0)      | 1 (0.3)    | 0 (0)      | 0 (0)      | 1 (0.2)    | 0 (0)      | 0 (0)      | 1 (0.2)    | 1 (0.2)    | 1 (0.1)    | 5 (0.1)     |
| Radiation therapy               | 2 (0.6)           | 0 (0)      | 1 (0.3)    | 1 (0.2)    | 2 (0.4)    | 1 (0.2)    | 0 (0)      | 0 (0)      | 1 (0.2)    | 1 (0.2)    | 1 (0.1)    | 10 (0.2)    |
| Other hospitalizations          | 267 (81.9)        | 264 (85.4) | 292 (80)   | 323 (80.3) | 359 (78.7) | --         | 303 (63.3) | 369 (62.9) | 362 (59.2) | 343 (52.1) | 358 (53.1) | 3594 (66.6) |
| Home care                       | 25 (7.7)          | 38 (12.3)  | 31 (8.5)   | 25 (6.2)   | 33 (7.2)   | 28 (5.3)   | 26 (5.4)   | 29 (4.9)   | 38 (6.2)   | 38 (5.8)   | 32 (4.7)   | 343 (6.4)   |
| <b>MELANOMA</b>                 |                   |            |            |            |            |            |            |            |            |            |            |             |
| <i>Total number of patients</i> | 320               | 302        | 350        | 368        | 332        | 350        | 362        | 351        | 348        | 406        | 327        | 3816        |
| Cancer-directed surgery         | 156 (48.8)        | 154 (51)   | 188 (53.7) | 213 (57.9) | 200 (60.2) | --         | 135 (37.3) | 122 (34.8) | 164 (47.1) | 201 (49.5) | 165 (50.5) | 1746 (45.8) |
| Chemotherapy                    | 13 (4.1)          | 20 (6.6)   | 17 (4.9)   | 19 (5.2)   | 24 (7.2)   | 27 (7.7)   | 21 (5.8)   | 29 (8.3)   | 39 (11.2)  | 42 (10.3)  | 41 (12.5)  | 292 (7.7)   |
| Radiation therapy               | 0 (0)             | 2 (0.7)    | 3 (0.9)    | 6 (1.6)    | 4 (1.2)    | 1 (0.3)    | 5 (1.4)    | 1 (0.3)    | 5 (1.4)    | 17 (4.2)   | 10 (3.1)   | 54 (1.4)    |
| Other hospitalizations          | 53 (16.6)         | 42 (13.9)  | 51 (14.6)  | 44 (12)    | 41 (12.3)  | --         | 81 (22.4)  | 91 (25.9)  | 91 (26.1)  | 80 (19.7)  | 82 (25.1)  | 694 (18.2)  |

1  
2  
3  
4  
5  
6  
7  
8  
9  
10  
11  
12  
13  
14  
15  
16  
17  
18  
19  
20  
21  
22  
23  
24  
25  
26  
27  
28  
29  
30  
31  
32  
33  
34  
35  
36  
37  
38  
39  
40  
41  
42  
43  
44  
45  
46  
47  
48  
49

|                                 |            |           |            |            |            |           |            |            |            |            |            |             |
|---------------------------------|------------|-----------|------------|------------|------------|-----------|------------|------------|------------|------------|------------|-------------|
| Home care                       | 32 (10)    | 35 (11.6) | 46 (13.1)  | 50 (13.6)  | 42 (12.7)  | 51 (14.6) | 51 (14.1)  | 44 (12.5)  | 72 (20.7)  | 63 (15.5)  | 64 (19.6)  | 550 (14.4)  |
| <b>TESTIS</b>                   |            |           |            |            |            |           |            |            |            |            |            |             |
| <i>Total number of patients</i> | 213        | 200       | 206        | 230        | 211        | 236       | 232        | 244        | 248        | 235        | 209        | 2464        |
| Cancer-directed surgery         | 197 (92.5) | 190 (95)  | 186 (90.3) | 217 (94.3) | 202 (95.7) | --        | 175 (75.4) | 234 (95.9) | 232 (93.5) | 223 (94.9) | 204 (97.6) | 2195 (89.1) |
| Chemotherapy                    | 64 (30)    | 66 (33)   | 66 (32)    | 81 (35.2)  | 59 (28)    | 64 (27.1) | 61 (26.3)  | 66 (27)    | 70 (28.2)  | 73 (31.1)  | 60 (28.7)  | 730 (29.6)  |
| Radiation therapy               | 56 (26.3)  | 53 (26.5) | 53 (25.7)  | 56 (24.3)  | 53 (25.1)  | 63 (26.7) | 51 (22)    | 45 (18.4)  | 41 (16.5)  | 38 (16.2)  | 28 (13.4)  | 537 (21.8)  |
| Other hospitalizations          | 59 (27.7)  | 48 (24)   | 41 (19.9)  | 45 (19.6)  | 47 (22.3)  | --        | 65 (28)    | 68 (27.9)  | 74 (29.8)  | 59 (25.1)  | 47 (22.5)  | 607 (24.6)  |
| Home care                       | 39 (18.3)  | 50 (25)   | 47 (22.8)  | 53 (23)    | 39 (18.5)  | 50 (21.2) | 50 (21.6)  | 40 (16.4)  | 59 (23.8)  | 53 (22.6)  | 39 (18.7)  | 519 (21.1)  |

Note: -- we do not have reliable data for this year.

Confidential

**Table 2B.** Number and percentage of patients age 45 years and older at diagnosis for specific cancer services by cancer site and year of diagnosis

|                                 | Year of Diagnosis |             |             |             |             |             |             |             |             |             |             | Total        |
|---------------------------------|-------------------|-------------|-------------|-------------|-------------|-------------|-------------|-------------|-------------|-------------|-------------|--------------|
|                                 | 1997              | 1998        | 1999        | 2000        | 2001        | 2002        | 2003        | 2004        | 2005        | 2006        | 2007        |              |
| <b>BREAST</b>                   |                   |             |             |             |             |             |             |             |             |             |             |              |
| <i>Total number of patients</i> | 4683              | 4686        | 4857        | 4794        | 4976        | 5229        | 4951        | 5145        | 5295        | 5423        | 5631        | 55670        |
| Cancer-directed surgery         | 4489 (95.9)       | 4484 (95.7) | 4678 (96.3) | 4577 (95.5) | 4761 (95.7) | --          | 4414 (89.2) | 4835 (94)   | 5004 (94.5) | 5152 (95)   | 5330 (94.7) | 51371 (92.3) |
| Chemotherapy                    | 1251 (26.7)       | 1385 (29.6) | 1558 (32.1) | 1696 (35.4) | 1976 (39.7) | 2009 (38.4) | 1746 (35.3) | 2100 (40.8) | 2196 (41.5) | 2306 (42.5) | 2471 (43.9) | 20694 (37.2) |
| Radiation therapy               | 2035 (43.5)       | 2217 (47.3) | 2247 (46.3) | 2373 (49.5) | 2421 (48.7) | 2546 (48.7) | 2603 (52.6) | 2746 (53.4) | 3293 (62.2) | 3633 (67)   | 3733 (66.3) | 29847 (53.6) |
| Other hospitalizations          | 918 (19.6)        | 980 (20.9)  | 958 (19.7)  | 971 (20.3)  | 1030 (20.7) | --          | 1196 (24.2) | 1390 (27)   | 1286 (24.3) | 1339 (24.7) | 1399 (24.8) | 12428 (22.3) |
| Home care                       | 2789 (59.6)       | 3028 (64.6) | 3377 (69.5) | 3450 (72)   | 3489 (70.1) | 3608 (69)   | 3591 (72.5) | 3646 (70.9) | 3806 (71.9) | 3943 (72.7) | 4065 (72.2) | 38792 (69.7) |
| <b>LUNG</b>                     |                   |             |             |             |             |             |             |             |             |             |             |              |
| <i>Total number of patients</i> | 1204              | 1191        | 1248        | 1282        | 1305        | 1195        | 1254        | 1342        | 1422        | 1449        | 1480        | 14372        |
| Cancer-directed surgery         | 952 (79.1)        | 957 (80.4)  | 928 (74.4)  | 962 (75)    | 975 (74.7)  | --          | 849 (67.7)  | 915 (68.2)  | 1014 (71.3) | 1046 (72.2) | 1077 (72.8) | 10449 (72.7) |
| Chemotherapy                    | 218 (18.1)        | 248 (20.8)  | 327 (26.2)  | 309 (24.1)  | 341 (26.1)  | 332 (27.8)  | 396 (31.6)  | 563 (42)    | 615 (43.2)  | 615 (42.4)  | 555 (37.5)  | 4519 (31.4)  |
| Radiation therapy               | 285 (23.7)        | 283 (23.8)  | 338 (27.1)  | 317 (24.7)  | 348 (26.7)  | 349 (29.2)  | 351 (28)    | 388 (28.9)  | 434 (30.5)  | 471 (32.5)  | 477 (32.2)  | 4041 (28.1)  |
| Other hospitalizations          | 722 (60)          | 703 (59)    | 698 (55.9)  | 724 (56.5)  | 712 (54.6)  | --          | 682 (54.4)  | 780 (58.1)  | 848 (59.6)  | 835 (57.6)  | 840 (56.8)  | 8039 (55.9)  |
| Home care                       | 510 (42.4)        | 535 (44.9)  | 546 (43.8)  | 549 (42.8)  | 489 (37.5)  | 439 (36.7)  | 521 (41.5)  | 581 (43.3)  | 675 (47.5)  | 752 (51.9)  | 774 (52.3)  | 6371 (44.3)  |
| <b>COLORECTAL</b>               |                   |             |             |             |             |             |             |             |             |             |             |              |
| <i>Total number of patients</i> | 3188              | 3479        | 3620        | 3873        | 3940        | 3951        | 3877        | 4254        | 4388        | 4505        | 4546        | 43621        |
| Cancer-directed surgery         | 2778 (87.1)       | 3002 (86.3) | 3173 (87.7) | 3397 (87.7) | 3436 (87.2) | --          | 3540 (91.3) | 3886 (91.3) | 3988 (90.9) | 4055 (90)   | 4073 (89.6) | 38868 (89.1) |
| Chemotherapy                    | 1183 (37.1)       | 1346 (38.7) | 1483 (41)   | 1587 (41)   | 1606 (40.8) | 1610 (40.7) | 1512 (39)   | 1718 (40.4) | 1850 (42.2) | 1794 (39.8) | 1900 (41.8) | 17589 (40.3) |
| Radiation therapy               | 348 (10.9)        | 367 (10.5)  | 430 (11.9)  | 467 (12.1)  | 463 (11.8)  | 522 (13.2)  | 513 (13.2)  | 574 (13.5)  | 694 (15.8)  | 717 (15.9)  | 751 (16.5)  | 5846 (13.4)  |
| Other hospitalizations          | 2463 (77.3)       | 2746 (78.9) | 2851 (78.8) | 3076 (79.4) | 3044 (77.3) | --          | 2935 (75.7) | 3615 (85)   | 3752 (85.5) | 3831 (85)   | 3827 (84.2) | 34219 (78.4) |
| Home care                       | 1650 (51.8)       | 1849 (53.1) | 1965 (54.3) | 2158 (55.7) | 1979 (50.2) | 1974 (50)   | 2055 (53)   | 2272 (53.4) | 2602 (59.3) | 2727 (60.5) | 2870 (63.1) | 24101 (55.3) |
| <b>PROSTATE</b>                 |                   |             |             |             |             |             |             |             |             |             |             |              |

1  
2  
3  
4  
5  
6  
7  
8  
9  
10  
11  
12  
13  
14  
15  
16  
17  
18  
19  
20  
21  
22  
23  
24  
25  
26  
27  
28  
29  
30  
31  
32  
33  
34  
35  
36  
37  
38  
39  
40  
41  
42  
43  
44  
45  
46  
47  
48  
49

|                                 |             |             |             |             |             |             |             |             |             |             |             |              |
|---------------------------------|-------------|-------------|-------------|-------------|-------------|-------------|-------------|-------------|-------------|-------------|-------------|--------------|
| <i>Total number of patients</i> | 4685        | 4684        | 4947        | 5351        | 6176        | 5846        | 5756        | 6321        | 6861        | 7246        | 7261        | 65134        |
| Cancer-directed surgery         | 2446 (52.2) | 2201 (47)   | 2266 (45.8) | 2352 (44)   | 2816 (45.6) | --          | 2740 (47.6) | 3073 (48.6) | 3370 (49.1) | 3498 (48.3) | 3403 (46.9) | 30791 (47.3) |
| Chemotherapy                    | 57 (1.2)    | 51 (1.1)    | 67 (1.4)    | 78 (1.5)    | 76 (1.2)    | 94 (1.6)    | 51 (0.9)    | 50 (0.8)    | 72 (1)      | 67 (0.9)    | 81 (1.1)    | 744 (1.1)    |
| Radiation therapy               | 1034 (22.1) | 1147 (24.5) | 1121 (22.7) | 1385 (25.9) | 1651 (26.7) | 1636 (28)   | 1582 (27.5) | 1677 (26.5) | 1949 (28.4) | 1968 (27.2) | 2253 (31)   | 17403 (26.7) |
| Other hospitalizations          | 2530 (54)   | 2516 (53.7) | 2605 (52.7) | 2666 (49.8) | 2945 (47.7) | --          | 2545 (44.2) | 3046 (48.2) | 3544 (51.7) | 3528 (48.7) | 3563 (49.1) | 30940 (47.5) |
| Home care                       | 1290 (27.5) | 1306 (27.9) | 1434 (29)   | 1482 (27.7) | 1631 (26.4) | 1512 (25.9) | 1602 (27.8) | 1764 (27.9) | 2093 (30.5) | 2273 (31.4) | 2345 (32.3) | 18732 (28.8) |

Note: -- we do not have reliable data for this year.

Confidential



**Table 3A.** Mean cost estimates for specific cancer services by cancer site and year of diagnosis for the initial year of treatment (patients under age 45 years at diagnosis) (95% confidence intervals in brackets)

|                                 | Year of Diagnosis       |                         |                         |                         |                         |                         |                         |                         |                         |                         |                         | Overall Mean Cost       |
|---------------------------------|-------------------------|-------------------------|-------------------------|-------------------------|-------------------------|-------------------------|-------------------------|-------------------------|-------------------------|-------------------------|-------------------------|-------------------------|
|                                 | 1997                    | 1998                    | 1999                    | 2000                    | 2001                    | 2002                    | 2003                    | 2004                    | 2005                    | 2006                    | 2007                    |                         |
| <b>BREAST</b>                   |                         |                         |                         |                         |                         |                         |                         |                         |                         |                         |                         |                         |
| <i>Total number of patients</i> | 810                     | 808                     | 826                     | 805                     | 802                     | 814                     | 795                     | 884                     | 930                     | 861                     | 812                     | 9,147                   |
| Cancer-directed surgery         | 3,584 (3,167; 4,001)    | 3,433 (3,251; 3,615)    | 3,358 (3,178; 3,538)    | 3,165 (2,994; 3,336)    | 3,115 (2,974; 3,257)    | --                      | 3,426 (3,247; 3,604)    | 3,978 (3,771; 4,186)    | 3,820 (3,661; 3,979)    | 4,330 (4,113; 4,547)    | 4,422 (4,165; 4,679)    | 3,586 (3,514; 3,658)    |
| Chemotherapy                    | 2,286 (2,146; 2,425)    | 2,201 (2,066; 2,337)    | 2,538 (2,255; 2,821)    | 2,589 (2,358; 2,821)    | 4,739 (4,448; 5,030)    | 5,119 (4,797; 5,442)    | 5,383 (4,997; 5,770)    | 6,139 (5,738; 6,540)    | 8,844 (8,193; 9,495)    | 10,836 (9,955; 11,717)  | 11,834 (10,890; 12,777) | 5,756 (5,588; 5,924)    |
| Radiation therapy               | 2,067 (1,899; 2,235)    | 2,030 (1,865; 2,194)    | 2,207 (2,033; 2,381)    | 2,160 (1,993; 2,327)    | 2,177 (2,007; 2,346)    | 2,311 (2,127; 2,495)    | 2,554 (2,352; 2,756)    | 3,102 (2,866; 3,337)    | 4,407 (4,104; 4,710)    | 5,374 (4,984; 5,764)    | 6,268 (5,816; 6,720)    | 3,180 (3,097; 3,264)    |
| Other hospitalizations          | 1,465 (1,157; 1,773)    | 1,297 (1,016; 1,578)    | 1,408 (1,130; 1,686)    | 1,138 (932; 1,344)      | 1,254 (1,035; 1,473)    | --                      | 1,229 (1,001; 1,457)    | 1,405 (1,141; 1,669)    | 1,326 (1,095; 1,556)    | 1,477 (1,243; 1,711)    | 1,862 (1,520; 2,203)    | 1,399 (1,319; 1,479)    |
| Home care                       | 1,275 (1,105; 1,446)    | 1,469 (1,294; 1,643)    | 1,679 (1,496; 1,861)    | 1,617 (1,439; 1,796)    | 1,204 (1,078; 1,331)    | 1,365 (1,189; 1,540)    | 1,351 (1,204; 1,497)    | 1,477 (1,332; 1,622)    | 2,269 (2,076; 2,462)    | 2,854 (2,633; 3,075)    | 2,706 (2,497; 2,915)    | 1,763 (1,709; 1,818)    |
| <b>Total Cost</b>               | 15,460 (14,641; 16,278) | 15,021 (14,296; 15,745) | 16,119 (15,370; 16,868) | 15,374 (14,656; 16,093) | 17,274 (16,534; 18,014) | 18,646 (17,762; 19,530) | 20,271 (19,403; 21,139) | 22,645 (21,754; 23,536) | 27,579 (26,536; 28,623) | 32,486 (31,147; 33,824) | 34,974 (33,563; 36,385) | 21,595 (21,273; 21,918) |
| <b>THYROID</b>                  |                         |                         |                         |                         |                         |                         |                         |                         |                         |                         |                         |                         |
| <i>Total number of patients</i> | 326                     | 309                     | 365                     | 402                     | 456                     | 526                     | 479                     | 587                     | 612                     | 658                     | 674                     | 5,394                   |
| Cancer-directed surgery         | 2,952 (2,744; 3,160)    | 3,098 (2,725; 3,471)    | 3,186 (2,721; 3,651)    | 2,830 (2,646; 3,014)    | 3,088 (2,907; 3,269)    | --                      | 4,228 (4,019; 4,438)    | 4,405 (4,226; 4,585)    | 4,140 (3,982; 4,299)    | 4,900 (4,722; 5,078)    | 4,730 (4,566; 4,894)    | 3,908 (3,840; 3,976)    |
| Chemotherapy                    | -                       | -                       | 8 (-8; 24)              | -                       | -                       | 1 (-1; 2)               | -                       | -                       | 0 (-0; 0)               | 16 (-16; 49)            | 7 (-7; 21)              | 4 (-1; 8)               |
| Radiation therapy               | 18 (-8; 44)             | -                       | 1 (-1; 2)               | 8 (-8; 24)              | 15 (-6; 36)             | 6 (-6; 18)              | -                       | -                       | 5 (-5; 16)              | 6 (-6; 17)              | 14 (-14; 42)            | 7 (2; 12)               |
| Other hospitalizations          | 2,946 (2,565; 3,327)    | 2,817 (2,492; 3,142)    | 2,684 (2,445; 2,924)    | 2,694 (2,458; 2,930)    | 2,878 (2,555; 3,201)    | --                      | 1,774 (1,521; 2,028)    | 1,862 (1,618; 2,107)    | 1,583 (1,448; 1,717)    | 1,510 (1,356; 1,664)    | 1,764 (1,508; 2,019)    | 2,088 (2,014; 2,163)    |
| Home care                       | 126 (-12; 264)          | 199 (29; 369)           | 56 (30; 82)             | 37 (13; 62)             | 45 (22; 68)             | 18 (10; 25)             | 53 (6; 100)             | 32 (15; 48)             | 82 (44; 121)            | 112 (45; 179)           | 81 (44; 119)            | 72 (55; 90)             |
| <b>Total Cost</b>               | 10,102 (9,205; 10,999)  | 9,745 (8,971; 10,519)   | 9,034 (8,274; 9,793)    | 8,695 (8,230; 9,161)    | 9,136 (8,651; 9,622)    | 8,436 (8,062; 8,811)    | 9,266 (8,803; 9,728)    | 9,771 (9,316; 10,226)   | 9,452 (9,077; 9,827)    | 10,242 (9,835; 10,648)  | 10,796 (10,291; 11,301) | 9,580 (9,424; 9,737)    |
| <b>MELANOMA</b>                 |                         |                         |                         |                         |                         |                         |                         |                         |                         |                         |                         |                         |
| <i>Total number of patients</i> | 320                     | 302                     | 350                     | 368                     | 332                     | 350                     | 362                     | 351                     | 348                     | 406                     | 327                     | 3,816                   |
| Cancer-directed surgery         | 751 (583; 919)          | 955 (722; 1,189)        | 1,158 (888; 1,427)      | 956 (801; 1,112)        | 1,245 (1,012; 1,478)    | --                      | 633 (504; 762)          | 679 (523; 834)          | 993 (804; 1,181)        | 1,117 (906; 1,328)      | 1,195 (951; 1,439)      | 910 (850; 969)          |

|                                 |                         |                         |                        |                         |                        |                        |                         |                         |                         |                         |                         |                         |
|---------------------------------|-------------------------|-------------------------|------------------------|-------------------------|------------------------|------------------------|-------------------------|-------------------------|-------------------------|-------------------------|-------------------------|-------------------------|
| Chemotherapy                    | 202 (86; 319)           | 484 (252; 715)          | 484 (244; 723)         | 464 (231; 697)          | 880 (524; 1,236)       | 730 (439; 1,021)       | 743 (408; 1,078)        | 1,012 (626; 1,398)      | 1,478 (1,023; 1,934)    | 1,400 (972; 1,827)      | 1,789 (1,244; 2,333)    | 888 (781; 996)          |
| Radiation therapy               | -                       | 28 (-12; 67)            | 30 (-6; 66)            | 55 (8; 102)             | 37 (1; 73)             | 9 (-8; 26)             | 56 (2; 111)             | 11 (-11; 33)            | 30 (1; 58)              | 216 (74; 357)           | 107 (31; 184)           | 56 (36; 75)             |
| Other hospitalizations          | 454 (310; 599)          | 745 (302; 1,187)        | 403 (242; 565)         | 386 (241; 531)          | 513 (323; 702)         | --                     | 693 (474; 912)          | 1,076 (766; 1,386)      | 839 (608; 1,070)        | 832 (563; 1,102)        | 1,402 (995; 1,810)      | 719 (637; 800)          |
| Home care                       | 141 (81; 201)           | 283 (158; 408)          | 233 (133; 334)         | 349 (199; 499)          | 243 (128; 359)         | 179 (116; 242)         | 216 (139; 294)          | 198 (108; 288)          | 460 (304; 617)          | 373 (261; 485)          | 675 (475; 875)          | 305 (269; 342)          |
| <b>Total Cost</b>               | 3,581 (2,974; 4,189)    | 5,062 (3,911; 6,213)    | 4,225 (3,466; 4,984)   | 3,967 (3,207; 4,728)    | 4,813 (3,930; 5,696)   | 3,929 (3,170; 4,688)   | 4,718 (3,851; 5,585)    | 5,354 (4,402; 6,305)    | 6,414 (5,268; 7,560)    | 6,438 (5,366; 7,510)    | 8,499 (6,976; 10,021)   | 5,188 (4,890; 5,486)    |
| <b>TESTIS</b>                   |                         |                         |                        |                         |                        |                        |                         |                         |                         |                         |                         |                         |
| <i>Total number of patients</i> | 213                     | 200                     | 206                    | 230                     | 211                    | 236                    | 232                     | 244                     | 248                     | 235                     | 209                     | 2,464                   |
| Cancer-directed surgery         | 3,245 (2,058; 4,433)    | 2,806 (2,397; 3,214)    | 2,550 (1,913; 3,187)   | 2,100 (1,733; 2,467)    | 1,690 (1,385; 1,996)   | --                     | 2,180 (1,366; 2,994)    | 2,340 (1,803; 2,877)    | 2,532 (1,991; 3,073)    | 3,378 (2,232; 4,524)    | 3,329 (1,572; 5,085)    | 2,479 (2,227; 2,731)    |
| Chemotherapy                    | 2,087 (1,607; 2,566)    | 2,006 (1,550; 2,463)    | 2,055 (1,593; 2,516)   | 2,271 (1,843; 2,699)    | 1,809 (1,385; 2,233)   | 1,837 (1,421; 2,253)   | 1,652 (1,216; 2,089)    | 1,724 (1,266; 2,182)    | 2,327 (1,800; 2,855)    | 2,816 (2,204; 3,428)    | 2,588 (1,932; 3,245)    | 2,106 (1,957; 2,256)    |
| Radiation therapy               | 804 (596; 1,012)        | 788 (592; 985)          | 833 (613; 1,054)       | 813 (606; 1,019)        | 805 (589; 1,021)       | 867 (669; 1,066)       | 658 (484; 832)          | 540 (388; 693)          | 521 (361; 680)          | 454 (308; 600)          | 421 (265; 576)          | 678 (622; 734)          |
| Other hospitalizations          | 2,014 (1,235; 2,794)    | 1,924 (875; 2,973)      | 1,181 (653; 1,710)     | 1,489 (860; 2,118)      | 1,468 (742; 2,194)     | --                     | 2,324 (1,503; 3,145)    | 2,469 (1,709; 3,228)    | 2,973 (1,237; 4,708)    | 2,936 (1,854; 4,019)    | 1,711 (1,010; 2,412)    | 2,070 (1,786; 2,354)    |
| Home care                       | 274 (123; 425)          | 362 (185; 539)          | 256 (157; 355)         | 315 (199; 430)          | 249 (138; 360)         | 300 (115; 484)         | 304 (171; 437)          | 224 (120; 328)          | 551 (283; 819)          | 1,065 (581; 1,548)      | 682 (335; 1,030)        | 419 (349; 490)          |
| <b>Total Cost</b>               | 14,474 (12,269; 16,679) | 12,946 (10,789; 15,102) | 11,331 (9,559; 13,104) | 11,950 (10,443; 13,457) | 11,109 (9,478; 12,739) | 11,486 (9,810; 13,162) | 12,891 (10,939; 14,842) | 12,626 (10,749; 14,504) | 14,356 (11,615; 17,096) | 17,259 (13,993; 20,525) | 13,694 (10,785; 16,603) | 13,133 (12,455; 13,810) |

Note: -- we do not have reliable data for this year.

**Table 3B.** Mean cost estimates for specific cancer services by cancer site and year of diagnosis for the initial year of treatment (patients age 45 years and older at diagnosis) (95% confidence intervals in brackets)

|                                 | Year of Diagnosis              |                                |                                |                                |                                |                                |                                |                                |                                |                                |                                | Overall Mean Cost              |
|---------------------------------|--------------------------------|--------------------------------|--------------------------------|--------------------------------|--------------------------------|--------------------------------|--------------------------------|--------------------------------|--------------------------------|--------------------------------|--------------------------------|--------------------------------|
|                                 | 1997                           | 1998                           | 1999                           | 2000                           | 2001                           | 2002                           | 2003                           | 2004                           | 2005                           | 2006                           | 2007                           |                                |
| <b>BREAST</b>                   |                                |                                |                                |                                |                                |                                |                                |                                |                                |                                |                                |                                |
| <i>Total number of patients</i> | 4,683                          | 4,686                          | 4,857                          | 4,794                          | 4,976                          | 5,229                          | 4,951                          | 5,145                          | 5,295                          | 5,423                          | 5,631                          | 55,670                         |
| Cancer-directed surgery         | 3,345 (3,198; 3,492)           | 3,273 (3,151; 3,394)           | 3,206 (3,093; 3,319)           | 3,028 (2,954; 3,102)           | 3,145 (3,048; 3,242)           | 2,384 (2,269; 2,499)           | 3,426 (3,341; 3,512)           | 3,840 (3,739; 3,942)           | 3,620 (3,527; 3,713)           | 4,294 (3,954; 4,634)           | 4,255 (4,141; 4,370)           | 3,455 (3,410; 3,501)           |
| Chemotherapy                    | 791 (747; 834)                 | 836 (791; 881)                 | 939 (887; 991)                 | 1,050 (992; 1,108)             | 1,759 (1,665; 1,853)           | 1,827 (1,732; 1,921)           | 2,169 (2,060; 2,277)           | 2,821 (2,693; 2,950)           | 4,152 (3,931; 4,373)           | 5,159 (4,899; 5,418)           | 5,978 (5,697; 6,259)           | 2,594 (2,543; 2,644)           |
| Radiation therapy               | 1,620 (1,560; 1,681)           | 1,680 (1,622; 1,739)           | 1,695 (1,634; 1,755)           | 1,701 (1,641; 1,760)           | 1,661 (1,603; 1,719)           | 1,701 (1,643; 1,759)           | 1,950 (1,882; 2,018)           | 2,330 (2,244; 2,415)           | 3,210 (3,100; 3,319)           | 4,189 (4,054; 4,324)           | 4,920 (4,772; 5,068)           | 2,480 (2,451; 2,509)           |
| Other hospitalizations          | 1,094 (974; 1,213)             | 1,081 (971; 1,191)             | 1,044 (932; 1,156)             | 1,098 (977; 1,220)             | 1,232 (1,107; 1,356)           | 1,218 (1,083; 1,353)           | 1,394 (1,263; 1,525)           | 1,609 (1,441; 1,778)           | 1,406 (1,265; 1,548)           | 1,619 (1,469; 1,769)           | 1,724 (1,539; 1,908)           | 1,332 (1,289; 1,374)           |
| Home care                       | 1,358 (1,267; 1,449)           | 1,532 (1,434; 1,630)           | 1,623 (1,524; 1,723)           | 1,685 (1,587; 1,783)           | 1,319 (1,234; 1,403)           | 1,298 (1,224; 1,372)           | 1,414 (1,331; 1,497)           | 1,514 (1,427; 1,601)           | 2,049 (1,955; 2,142)           | 2,538 (2,439; 2,637)           | 2,504 (2,415; 2,593)           | 1,731 (1,703; 1,758)           |
| <i>Total Cost</i>               | <i>12,909 (12,556; 13,261)</i> | <i>13,144 (12,774; 13,513)</i> | <i>13,785 (13,456; 14,115)</i> | <i>13,903 (13,555; 14,251)</i> | <i>14,424 (14,030; 14,817)</i> | <i>14,552 (14,139; 14,965)</i> | <i>17,177 (16,768; 17,587)</i> | <i>19,487 (19,018; 19,956)</i> | <i>22,626 (22,069; 23,182)</i> | <i>26,638 (25,960; 27,316)</i> | <i>28,718 (28,093; 29,344)</i> | <i>18,229 (18,078; 18,380)</i> |
| <b>LUNG</b>                     |                                |                                |                                |                                |                                |                                |                                |                                |                                |                                |                                |                                |
| <i>Total number of patients</i> | 1,204                          | 1,191                          | 1,248                          | 1,282                          | 1,305                          | 1,195                          | 1,254                          | 1,342                          | 1,422                          | 1,449                          | 1,480                          | 14,372                         |
| Cancer-directed surgery         | 9,046 (8,450; 9,643)           | 8,697 (8,153; 9,241)           | 7,890 (7,376; 8,403)           | 7,953 (7,450; 8,457)           | 8,818 (8,248; 9,389)           | 8,041 (7,240; 8,842)           | 8,697 (7,890; 9,504)           | 8,374 (7,682; 9,066)           | 8,959 (8,275; 9,644)           | 11,130 (9,817; 12,443)         | 10,737 (9,887; 11,587)         | 8,997 (8,763; 9,232)           |
| Chemotherapy                    | 685 (574; 795)                 | 860 (731; 989)                 | 1,398 (1,226; 1,571)           | 1,431 (1,243; 1,619)           | 1,495 (1,316; 1,673)           | 1,601 (1,415; 1,788)           | 2,055 (1,836; 2,275)           | 2,804 (2,559; 3,049)           | 2,935 (2,704; 3,167)           | 2,853 (2,630; 3,076)           | 2,576 (2,359; 2,794)           | 1,931 (1,870; 1,993)           |
| Radiation therapy               | 676 (596; 755)                 | 686 (603; 769)                 | 833 (740; 926)                 | 710 (630; 790)                 | 780 (698; 862)                 | 905 (812; 999)                 | 838 (749; 927)                 | 955 (859; 1,051)               | 1,078 (964; 1,193)             | 1,277 (1,142; 1,412)           | 1,498 (1,327; 1,668)           | 947 (914; 980)                 |
| Other hospitalizations          | 3,621 (3,165; 4,077)           | 3,666 (3,280; 4,051)           | 3,228 (2,839; 3,617)           | 3,747 (3,238; 4,256)           | 3,638 (3,212; 4,063)           | 3,283 (2,836; 3,731)           | 3,489 (3,123; 3,855)           | 4,084 (3,609; 4,559)           | 3,990 (3,581; 4,399)           | 4,752 (4,199; 5,305)           | 4,472 (3,833; 5,112)           | 3,845 (3,701; 3,989)           |
| Home care                       | 1,784 (1,543; 2,025)           | 1,544 (1,345; 1,743)           | 1,508 (1,312; 1,704)           | 1,685 (1,462; 1,908)           | 1,082 (919; 1,245)             | 1,051 (870; 1,232)             | 1,249 (1,061; 1,437)           | 1,398 (1,217; 1,580)           | 2,107 (1,871; 2,343)           | 2,216 (2,039; 2,393)           | 2,236 (2,039; 2,433)           | 1,646 (1,584; 1,708)           |

|                                 |                               |                               |                               |                               |                               |                               |                               |                               |                               |                               |                               |                               |
|---------------------------------|-------------------------------|-------------------------------|-------------------------------|-------------------------------|-------------------------------|-------------------------------|-------------------------------|-------------------------------|-------------------------------|-------------------------------|-------------------------------|-------------------------------|
|                                 | 2,025)                        | 1,743)                        | 1,703)                        | 1,908)                        | 1,244)                        | 1,233)                        | 1,436)                        | 1,579)                        | 2,343)                        | (2,008;<br>2,425)             | 2,432)                        | 1,708)                        |
| <b>Total Cost</b>               | 22,037<br>(21,042;<br>23,033) | 21,688<br>(20,712;<br>22,663) | 20,712<br>(19,829;<br>21,595) | 21,715<br>(20,741;<br>22,689) | 22,163<br>(21,240;<br>23,086) | 22,844<br>(21,651;<br>24,037) | 25,002<br>(23,826;<br>26,178) | 27,492<br>(26,293;<br>28,691) | 29,630<br>(28,410;<br>30,850) | 33,968<br>(32,218;<br>35,717) | 33,797<br>(32,210;<br>35,384) | 25,876<br>(25,495;<br>26,257) |
| <b>COLORECTAL</b>               |                               |                               |                               |                               |                               |                               |                               |                               |                               |                               |                               |                               |
| <i>Total number of patients</i> | 3,188                         | 3,479                         | 3,620                         | 3,873                         | 3,940                         | 3,951                         | 3,877                         | 4,254                         | 4,388                         | 4,505                         | 4,546                         | 43,621                        |
| Cancer-directed surgery         | 9,637 (9,288;<br>9,986)       | 9,598 (9,238;<br>9,958)       | 9,705 (9,404;<br>10,005)      | 10,283<br>(9,928;<br>10,638)  | 10,694<br>(10,360;<br>11,027) | 11,073<br>(10,645;<br>11,501) | 12,121<br>(11,663;<br>12,579) | 12,675<br>(12,197;<br>13,153) | 12,597<br>(12,118;<br>13,077) | 14,939<br>(14,253;<br>15,626) | 16,080<br>(15,406;<br>16,754) | 11,956<br>(11,808;<br>12,105) |
| Chemotherapy                    | 2,773 (2,624;<br>2,923)       | 2,907 (2,755;<br>3,058)       | 3,242 (3,086;<br>3,398)       | 3,368 (3,202;<br>3,534)       | 3,501 (3,324;<br>3,679)       | 3,375 (3,196;<br>3,554)       | 3,916 (3,698;<br>4,134)       | 4,421 (4,208;<br>4,635)       | 4,371 (4,164;<br>4,578)       | 3,438<br>(3,279;<br>3,597)    | 5,907 (5,639;<br>6,175)       | 3,814 (3,755;<br>3,874)       |
| Radiation therapy               | 522 (468;<br>575)             | 505 (454;<br>555)             | 569 (517;<br>621)             | 558 (509;<br>607)             | 542 (494;<br>591)             | 592 (543;<br>642)             | 589 (539;<br>639)             | 599 (551;<br>647)             | 708 (657;<br>760)             | 738 (685;<br>792)             | 849 (787;<br>911)             | 624 (609;<br>640)             |
| Other hospitalizations          | 3,931 (3,680;<br>4,183)       | 4,157 (3,902;<br>4,413)       | 4,087 (3,813;<br>4,361)       | 4,232 (3,951;<br>4,513)       | 4,144 (3,894;<br>4,394)       | 2,993 (2,758;<br>3,227)       | 3,270 (3,043;<br>3,498)       | 3,794 (3,557;<br>4,031)       | 3,930 (3,676;<br>4,184)       | 4,228<br>(3,977;<br>4,480)    | 4,610 (4,301;<br>4,919)       | 3,952 (3,874;<br>4,031)       |
| Home care                       | 2,190 (2,046;<br>2,333)       | 2,274 (2,129;<br>2,418)       | 2,300 (2,151;<br>2,449)       | 2,390 (2,252;<br>2,529)       | 1,799 (1,682;<br>1,916)       | 1,777 (1,664;<br>1,890)       | 1,925 (1,810;<br>2,039)       | 2,053 (1,934;<br>2,172)       | 3,031 (2,885;<br>3,177)       | 3,526<br>(3,378;<br>3,674)    | 3,679 (3,534;<br>3,823)       | 2,492 (2,450;<br>2,533)       |
| <b>Total Cost</b>               | 24,769<br>(24,101;<br>25,438) | 25,170<br>(24,516;<br>25,824) | 25,534<br>(24,907;<br>26,161) | 26,699<br>(26,036;<br>27,362) | 27,125<br>(26,427;<br>27,823) | 26,958<br>(26,190;<br>27,727) | 30,274<br>(29,415;<br>31,133) | 32,211<br>(31,360;<br>33,062) | 34,797<br>(33,856;<br>35,737) | 37,821<br>(36,701;<br>38,941) | 43,089<br>(41,902;<br>44,276) | 30,928<br>(30,657;<br>31,199) |
| <b>PROSTATE</b>                 |                               |                               |                               |                               |                               |                               |                               |                               |                               |                               |                               |                               |
| <i>Total number of patients</i> | 4,685                         | 4,684                         | 4,947                         | 5,351                         | 6,176                         | 5,846                         | 5,756                         | 6,321                         | 6,861                         | 7,246                         | 7,261                         | 65,134                        |
| Cancer-directed surgery         | 2,886 (2,753;<br>3,019)       | 2,591 (2,468;<br>2,713)       | 2,544 (2,434;<br>2,653)       | 2,447 (2,350;<br>2,545)       | 2,775 (2,669;<br>2,882)       | 2,678 (2,570;<br>2,786)       | 2,994 (2,836;<br>3,153)       | 3,225 (3,096;<br>3,353)       | 3,174 (3,083;<br>3,264)       | 3,786<br>(3,629;<br>3,943)    | 3,815 (3,687;<br>3,944)       | 3,050 (3,012;<br>3,088)       |
| Chemotherapy                    | 23 (12; 34)                   | 10 (6; 14)                    | 15 (7; 22)                    | 19 (6; 31)                    | 19 (12; 26)                   | 27 (17; 36)                   | 30 (17; 43)                   | 16 (9; 24)                    | 34 (18; 50)                   | 26 (15; 36)                   | 29 (16; 42)                   | 23 (20; 26)                   |
| Radiation therapy               | 1,334 (1,259;<br>1,409)       | 1,613 (1,527;<br>1,700)       | 1,559 (1,472;<br>1,646)       | 1,792 (1,703;<br>1,882)       | 1,926 (1,838;<br>2,014)       | 2,087 (1,992;<br>2,181)       | 2,146 (2,046;<br>2,245)       | 2,077 (1,981;<br>2,172)       | 2,339 (2,236;<br>2,443)       | 2,402<br>(2,293;<br>2,512)    | 2,978 (2,849;<br>3,106)       | 2,084 (2,053;<br>2,115)       |
| Other hospitalizations          | 1,598 (1,463;<br>1,732)       | 1,631 (1,488;<br>1,774)       | 1,660 (1,520;<br>1,800)       | 1,574 (1,448;<br>1,699)       | 1,619 (1,496;<br>1,743)       | 1,223 (1,081;<br>1,364)       | 1,627 (1,470;<br>1,784)       | 1,557 (1,421;<br>1,692)       | 1,588 (1,449;<br>1,726)       | 1,629<br>(1,492;<br>1,766)    | 1,725 (1,589;<br>1,860)       | 1,586 (1,544;<br>1,628)       |
| Home care                       | 501 (436;<br>565)             | 474 (411;<br>537)             | 478 (421;<br>535)             | 409 (360;<br>458)             | 313 (279;<br>348)             | 311 (272;<br>351)             | 350 (302;<br>397)             | 324 (289;<br>360)             | 524 (484;<br>564)             | 638 (599;<br>676)             | 645 (604;<br>686)             | 458 (444;<br>472)             |
| <b>Total Cost</b>               | 11,490<br>(11,179;<br>11,801) | 11,617<br>(11,311;<br>11,922) | 11,814<br>(11,519;<br>12,109) | 11,774<br>(11,501;<br>12,046) | 12,081<br>(11,807;<br>12,356) | 11,931<br>(11,630;<br>12,232) | 12,894<br>(12,553;<br>13,235) | 13,099<br>(12,758;<br>13,440) | 13,367<br>(13,050;<br>13,683) | 13,800<br>(13,469;<br>14,131) | 15,141<br>(14,777;<br>15,505) | 12,785<br>(12,687;<br>12,882) |

Note: -- we do not have reliable data for this year.
